# Supplementary material
Source: PubMed Central journal article supplement (PMC11181388)
Supplement: media-1.pdf [file media-1.pdf]

| Protein FDR | Accession | Description                                                                                                                  | # PSMs | # Peptides | # Unique | Peptide MW [kDa] | Coverage | # AAs | calc. pl | KO+GFP_#1  |            |            | KO+GFP_#2  |            |            | KO+GFP_#3  |            |            | KO+WT_#4 | KO+WT_#5 | KO+WT_#6 | KO+GFP_#1 | KO+GFP_#2 | KO+GFP_#3 | KO+WT_#4 | KO+WT_#5 | KO+WT_#6 | # Peptides: A2 | # Peptides: B2 | # Peptides: C2 | # Peptides: D2 | # Peptides: E2 | # Peptides: F2 |            |            |            |
|-------------|-----------|------------------------------------------------------------------------------------------------------------------------------|--------|------------|----------|------------------|----------|-------|----------|------------|------------|------------|------------|------------|------------|------------|------------|------------|----------|----------|----------|-----------|-----------|-----------|----------|----------|----------|----------------|----------------|----------------|----------------|----------------|----------------|------------|------------|------------|
|             |           |                                                                                                                              |        |            |          |                  |          |       |          | # PSMs: A2 | # PSMs: B2 | # PSMs: C2 | # PSMs: D2 | # PSMs: E2 | # PSMs: F2 | # PSMs: A2 | # PSMs: B2 | # PSMs: C2 |          |          |          |           |           |           |          |          |          |                |                |                |                |                |                | # PSMs: D2 | # PSMs: E2 | # PSMs: F2 |
| High        | P35579    | Myosin-9 OS=Homo sapiens OX=9606 GN=MYH9 PE=1 SV=4                                                                           | 6611   | 165        | 135      | 226.4            | 67       | 1960  | 5.6      | 872        | 926        | 1036       | 224        | 345        | 233        | 145        | 143        | 140        | 93       | 113      | 96       |           |           |           |          |          |          |                |                |                |                |                |                |            |            |            |
| High        | Q9U6Y5    | SWISS-PROT:Q9U6Y5 Green fluorescent protein (GFP-Cter-HisTag)                                                                | 4079   | 24         | 24       | 28.1             | 69       | 249   | 6.52     | 951        | 1033       | 927        | 200        | 186        | 189        | 23         | 23         | 20         | 10       | 9        | 10       |           |           |           |          |          |          |                |                |                |                |                |                |            |            |            |
| High        | Q72406    | Myosin-14 OS=Homo sapiens OX=9606 GN=MYH14 PE=1 SV=2                                                                         | 3222   | 140        | 126      | 227.7            | 65       | 1995  | 5.6      | 482        | 489        | 515        | 118        | 168        | 128        | 124        | 123        | 122        | 75       | 84       | 77       |           |           |           |          |          |          |                |                |                |                |                |                |            |            |            |
| High        | U15294    | UDP-N-acetylglucosamine-peptide N-acetylglucosaminyltransferase 110 kDa subunit OS=Homo sapiens OX=9606 GN=OGT PE=1 SV=5     | 2242   | 54         | 54       | 116.9            | 61       | 1046  | 6.7      |            |            |            | 2          | 293        | 483        | 327        |            |            |          |          |          |           |           |           |          |          |          |                |                |                |                |                |                |            |            |            |
| High        | P49792    | E3 SUMO-protein ligase RanBP2 OS=Homo sapiens OX=9606 GN=RANBP2 PE=1 SV=2                                                    | 2541   | 182        | 127      | 358              | 67       | 3224  | 6.2      | 8          | 11         | 13         | 40         | 44         | 37         | 8          | 11         | 13         | 39       | 42       | 35       |           |           |           |          |          |          |                |                |                |                |                |                |            |            |            |
| High        | P60709    | Actin, cytoplasmic 1 OS=Homo sapiens OX=9606 GN=ACTB PE=1 SV=1                                                               | 2101   | 25         | 10       | 41.7             | 74       | 375   | 5.48     | 246        | 268        | 268        | 120        | 147        | 118        | 21         | 21         | 21         | 16       | 15       | 16       |           |           |           |          |          |          |                |                |                |                |                |                |            |            |            |
| High        | P05787    | SWISS-PROT:P05787 Tax. id=9606 Gene_Symbol=KRT8 Keratin, type II cytoskeletal 8                                              | 1901   | 72         | 72       | 193.5            | 52       | 1873  | 5.69     | 81         | 425        | 460        | 85         | 106        | 84         | 46         | 46         | 46         | 30       | 31       | 31       |           |           |           |          |          |          |                |                |                |                |                |                |            |            |            |
| High        | Q15149    | Plectin OS=Homo sapiens OX=9606 GN=PLC PE=1 SV=3                                                                             | 1463   | 228        | 220      | 531.5            | 53       | 4684  | 5.96     | 212        | 220        | 226        | 99         | 113        | 101        | 178        | 182        | 182        | 94       | 104      | 97       |           |           |           |          |          |          |                |                |                |                |                |                |            |            |            |
| High        | P68133    | Actin, alpha skeletal muscle OS=Homo sapiens OX=9606 GN=ACTA1 PE=1 SV=1                                                      | 1270   | 19         | 6        | 42               | 54       | 377   | 5.39     | 122        | 124        | 161        | 98         | 91         | 96         | 13         | 15         | 14         | 12       | 10       | 14       |           |           |           |          |          |          |                |                |                |                |                |                |            |            |            |
| High        | P51610    | Host cell factor 1 OS=Homo sapiens OX=9606 GN=HCF1 PE=1 SV=2                                                                 | 1227   | 61         | 61       | 208.6            | 44       | 2035  | 7.46     |            |            |            | 1          | 161        | 193        | 173        | 1          |            |          |          |          |           |           |           |          |          |          |                |                |                |                |                |                |            |            |            |
| High        | P35580    | Myosin-10 OS=Homo sapiens OX=9606 GN=MYH10 PE=1 SV=3                                                                         | 1221   | 109        | 82       | 228.9            | 56       | 1976  | 5.54     | 162        | 178        | 176        | 48         | 73         | 53         | 90         | 89         | 90         | 36       | 44       | 37       |           |           |           |          |          |          |                |                |                |                |                |                |            |            |            |
| High        | Q13813    | Spectrin alpha chain, non-erythrocytic 1 OS=Homo sapiens OX=9606 GN=SPTAN1 PE=1 SV=3                                         | 1055   | 141        | 141      | 284.4            | 68       | 2472  | 5.35     | 165        | 176        | 183        | 37         | 46         | 38         | 113        | 119        | 121        | 37       | 45       | 38       |           |           |           |          |          |          |                |                |                |                |                |                |            |            |            |
| High        | P78527    | DNA-dependent protein kinase catalytic subunit OS=Homo sapiens OX=9606 GN=PRKDC PE=1 SV=3                                    | 1009   | 159        | 159      | 468.8            | 42       | 4128  | 7.12     | 143        | 144        | 127        | 67         | 73         | 65         | 127        | 126        | 111        | 63       | 73       | 67       |           |           |           |          |          |          |                |                |                |                |                |                |            |            |            |
| High        | Q01082    | Spectrin beta chain, non-erythrocytic 1 OS=Homo sapiens OX=9606 GN=SPTB1 PE=1 SV=2                                           | 907    | 127        | 116      | 274.4            | 63       | 2364  | 5.57     | 147        | 151        | 139        | 27         | 33         | 27         | 101        | 107        | 100        | 26       | 31       | 23       |           |           |           |          |          |          |                |                |                |                |                |                |            |            |            |
| High        | Q09666    | Neuroblast differentiation-associated protein AHNAK OS=Homo sapiens OX=9606 GN=AHNAK PE=1 SV=2                               | 903    | 172        | 172      | 628.7            | 59       | 5890  | 6.15     | 60         | 61         | 90         | 75         | 93         | 76         | 55         | 53         | 77         | 68       | 77       | 68       |           |           |           |          |          |          |                |                |                |                |                |                |            |            |            |
| High        | P08727    | Keratin, type I cytoskeletal 19 OS=Homo sapiens OX=9606 GN=KRT19 PE=1 SV=4                                                   | 859    | 40         | 25       | 44.1             | 79       | 400   | 5.14     | 204        | 195        | 217        | 35         | 46         | 37         | 38         | 40         | 38         | 22       | 22       | 22       |           |           |           |          |          |          |                |                |                |                |                |                |            |            |            |
| High        | H05783    | Keratin, type I cytoskeletal 18 OS=Homo sapiens OX=9606 GN=KRT18 PE=1 SV=2                                                   | 803    | 30         | 20       | 48               | 61       | 430   | 5.45     | 161        | 160        | 164        | 44         | 52         | 42         | 29         | 26         | 27         | 19       | 19       | 18       |           |           |           |          |          |          |                |                |                |                |                |                |            |            |            |
| High        | P60560    | Myosin light polypeptide 6 OS=Homo sapiens OX=9606 GN=MYL6 PE=1 SV=2                                                         | 782    | 13         | 9        | 16.9             | 85       | 151   | 4.65     | 106        | 121        | 122        | 44         | 49         | 47         | 11         | 12         | 13         | 8        | 8        | 9        |           |           |           |          |          |          |                |                |                |                |                |                |            |            |            |
| High        | H-INV-HIT | Tax. id=9606 Gene_Symbol=Keratin, type II cytoskeletal 8                                                                     | 771    | 24         | 1        | 49.4             | 44       | 443   | 5.2      | 163        | 167        | 176        | 32         | 44         | 34         | 24         | 22         | 22         | 14       | 15       | 15       |           |           |           |          |          |          |                |                |                |                |                |                |            |            |            |
| High        | AMNHR9    | Structural maintenance of chromosomes flexible hinge domain-containing protein 1 OS=Homo sapiens OX=9606 GN=SMCHD1 PE=1 SV=3 | 769    | 93         | 93       | 226.2            | 49       | 2005  | 7.3      | 5          | 4          | 5          | 91         | 113        | 92         | 5          | 4          | 5          | 62       | 69       | 59       |           |           |           |          |          |          |                |                |                |                |                |                |            |            |            |
| High        | Q8WVW1    | LIM domain only protein 7 OS=Homo sapiens OX=9606 GN=LMO7 PE=1 SV=3                                                          | 745    | 73         | 73       | 192.6            | 42       | 1683  | 8.09     | 114        | 107        | 108        | 32         | 37         | 33         | 63         | 63         | 56         | 29       | 30       | 30       |           |           |           |          |          |          |                |                |                |                |                |                |            |            |            |
| High        | P35749    | Myosin-11 OS=Homo sapiens OX=9606 GN=MYH11 PE=1 SV=3                                                                         | 716    | 26         | 1        | 227.2            | 12       | 1972  | 5.5      | 95         | 94         | 105        | 27         | 52         | 32         | 24         | 23         | 20         | 15       | 20       | 17       |           |           |           |          |          |          |                |                |                |                |                |                |            |            |            |
| High        | P07437    | Tubulin beta chain OS=Homo sapiens OX=9606 GN=TUBB PE=1 SV=2                                                                 | 676    | 25         | 4        | 49.6             | 73       | 444   | 4.89     | 98         | 97         | 88         | 44         | 54         | 46         | 23         | 25         | 24         | 14       | 14       | 13       |           |           |           |          |          |          |                |                |                |                |                |                |            |            |            |
| High        | P02545    | Prelamin-A/C OS=Homo sapiens OX=9606 GN=LMNA PE=1 SV=1                                                                       | 675    | 46         | 45       | 74.1             | 69       | 664   | 7.02     | 132        | 130        | 144        | 37         | 43         | 40         | 43         | 44         | 25         | 28       | 31       | 34       |           |           |           |          |          |          |                |                |                |                |                |                |            |            |            |
| High        | P68371    | Tubulin beta-4B chain OS=Homo sapiens OX=9606 GN=TUBB4B PE=1 SV=1                                                            | 674    | 25         | 1        | 49.8             | 73       | 445   | 4.89     | 101        | 98         | 88         | 43         | 52         | 43         | 23         | 25         | 24         | 14       | 14       | 13       |           |           |           |          |          |          |                |                |                |                |                |                |            |            |            |
| High        | Q56281    | Beta-actin-like protein 2 OS=Homo sapiens OX=9606 GN=ACTL2 PE=1 SV=2                                                         | 656    | 12         | 5        | 42               | 36       | 376   | 5.59     | 50         | 52         | 83         | 64         | 50         | 62         | 8          | 6          | 4          | 5        | 5        | 5        |           |           |           |          |          |          |                |                |                |                |                |                |            |            |            |
| High        | P52732    | Kinesin-like protein KIF11 OS=Homo sapiens OX=9606 GN=KIF11 PE=1 SV=2                                                        | 638    | 60         | 60       | 119.1            | 53       | 1056  | 5.64     | 69         | 61         | 64         | 70         | 91         | 76         | 49         | 43         | 44         | 44       | 46       | 45       |           |           |           |          |          |          |                |                |                |                |                |                |            |            |            |
| High        | Q00610    | Conventional myosin-V OS=Homo sapiens OX=9606 GN=MYO6 PE=1 SV=4                                                              | 631    | 72         | 72       | 193.5            | 52       | 1873  | 5.69     | 81         | 425        | 460        | 85         | 106        | 84         | 46         | 46         | 46         | 30       | 31       | 31       |           |           |           |          |          |          |                |                |                |                |                |                |            |            |            |
| High        | P04350    | Tubulin beta-4A chain OS=Homo sapiens OX=9606 GN=TUBB4A PE=1 SV=2                                                            | 607    | 21         | 1        | 49.6             | 62       | 444   | 4.88     | 91         | 88         | 80         | 39         | 44         | 38         | 19         | 20         | 11         | 10       | 11       | 11       |           |           |           |          |          |          |                |                |                |                |                |                |            |            |            |
| High        | P49327    | Fatty acid synthase OS=Homo sapiens OX=9606 GN=FSN PE=1 SV=3                                                                 | 603    | 85         | 84       | 273.3            | 45       | 2511  | 6.44     | 71         | 78         | 71         | 39         | 48         | 48         | 61         | 65         | 61         | 37       | 44       | 44       |           |           |           |          |          |          |                |                |                |                |                |                |            |            |            |
| High        | Q98TC0    | Death-inducible oligomer 1 OS=Homo sapiens OX=9606 GN=DIOL1 PE=1 SV=5                                                        | 600    | 75         | 74       | 243.7            | 48       | 2240  | 7.88     |            |            |            | 1          | 77         | 99         | 85         |            |            |          |          |          |           |           |           |          |          |          |                |                |                |                |                |                |            |            |            |
| High        | O75369    | Filamin-B OS=Homo sapiens OX=9606 GN=FLNB PE=1 SV=2                                                                          | 591    | 100        | 94       | 278              | 53       | 2602  | 5.73     | 62         | 73         | 74         | 47         | 49         | 49         | 58         | 66         | 69         | 43       | 46       | 48       |           |           |           |          |          |          |                |                |                |                |                |                |            |            |            |
| High        | Q14974    | Importin subunit beta-1 OS=Homo sapiens OX=9606 GN=KPNA1 PE=1 SV=2                                                           | 584    | 31         | 31       | 97.1             | 44       | 876   | 4.78     | 13         | 14         | 14         | 8          | 11         | 9          | 12         | 13         | 12         | 8        | 11       | 9        |           |           |           |          |          |          |                |                |                |                |                |                |            |            |            |
| High        | P11142    | Heat shock cognate 71 kDa protein OS=Homo sapiens OX=9606 GN=HSPA7 PE=1 SV=1                                                 | 571    | 35         | 23       | 70.9             | 69       | 646   | 5.52     | 50         | 47         | 55         | 63         | 77         | 58         | 29         | 26         | 30         | 22       | 27       | 22       |           |           |           |          |          |          |                |                |                |                |                |                |            |            |            |
| High        | P15924    | Desmoplakin OS=Homo sapiens OX=9606 GN=DSP PE=1 SV=3                                                                         | 543    | 103        | 103      | 331.6            | 40       | 2871  | 6.81     | 76         | 75         | 71         | 45         | 46         | 43         | 70         | 69         | 64         | 44       | 45       | 42       |           |           |           |          |          |          |                |                |                |                |                |                |            |            |            |
| High        | Q92614    | Unconventional myosin-XVIIa OS=Homo sapiens OX=9606 GN=MYO18A PE=1 SV=3                                                      | 537    | 87         | 87       | 233              | 49       | 2054  | 6.3      | 72         | 79         | 73         | 22         | 23         | 22         | 63         | 69         | 62         | 20       | 22       | 20       |           |           |           |          |          |          |                |                |                |                |                |                |            |            |            |
| High        | Q14950    | Myosin regulatory light chain 12B OS=Homo sapiens OX=9606 GN=MYL12B PE=1 SV=2                                                | 532    | 12         | 12       | 19.8             | 63       | 172   | 4.84     | 76         | 74         | 74         | 15         | 25         | 16         | 12         | 11         | 11         | 7        | 8        | 7        |           |           |           |          |          |          |                |                |                |                |                |                |            |            |            |
| High        | Q13885    | Tubulin beta-2A chain OS=Homo sapiens OX=9606 GN=TUBB2A PE=1 SV=1                                                            | 524    | 22         | 4        | 49.9             | 67       | 445   | 4.89     | 76         | 74         | 71         | 36         | 46         | 38         | 18         | 18         | 18         | 10       | 11       | 9        |           |           |           |          |          |          |                |                |                |                |                |                |            |            |            |
| High        | Q14715    | RANBP2-like and GRIP domain-containing protein 8 OS=Homo sapiens OX=9606 GN=RGDP8 PE=1 SV=2                                  | 494    | 66         | 2        | 198.9            | 41       | 1765  | 6.49     | 2          | 4          | 9          | 12         | 8          | 2          | 2          | 2          | 4          | 9        | 11       | 8        |           |           |           |          |          |          |                |                |                |                |                |                |            |            |            |
| High        | P38646    | Stress-70 protein, mitochondrial OS=Homo sapiens OX=9606 GN=HSPA9 PE=1 SV=2                                                  | 490    | 35         | 35       | 73.6             | 58       | 679   | 6.16     | 48         | 53         | 56         | 39         | 54         | 41         | 27         | 28         | 31         | 24       | 26       | 25       |           |           |           |          |          |          |                |                |                |                |                |                |            |            |            |
| High        | Q09666    | RANBP2-like and GRIP domain-containing protein 5/                                                                            |        |            |          |                  |          |       |          |            |            |            |            |            |            |            |            |            |          |          |          |           |           |           |          |          |          |                |                |                |                |                |                |            |            |            |

|      |        |                                                                                                                    |     |    |    |       |    |      |       |    |    |    |    |    |    |    |    |    |    |    |    |
|------|--------|--------------------------------------------------------------------------------------------------------------------|-----|----|----|-------|----|------|-------|----|----|----|----|----|----|----|----|----|----|----|----|
| High | P54652 | Heat shock-related 70 kDa protein 2 OS=Homo sapiens OX=9606 GN=HSPA2 PE=1 SV=1                                     | 164 | 12 | 1  | 70    | 18 | 639  | 5.74  | 14 | 13 | 16 | 18 | 26 | 15 | 9  | 8  | 10 | 8  | 10 | 7  |
| High | Q9C0C2 | 182 kDa tankyrase-1-binding protein OS=Homo sapiens OX=9606 GN=TNKS1BP1 PE=1 SV=4                                  | 164 | 37 | 37 | 181.7 | 33 | 1729 | 4.86  | 10 | 11 | 13 | 15 | 13 | 13 | 10 | 11 | 13 | 15 | 13 | 13 |
| High | P06396 | Gelsolin OS=Homo sapiens OX=9606 GN=GSN PE=1 SV=1                                                                  | 162 | 23 | 10 | 85.6  | 39 | 782  | 16.28 | 19 | 21 | 25 | 4  | 12 | 8  | 15 | 16 | 18 | 4  | 9  | 8  |
| High | P14923 | Junction plakoglobin OS=Homo sapiens OX=9606 GN=JUP PE=1 SV=3                                                      | 162 | 23 | 19 | 81.7  | 36 | 745  | 6.14  | 21 | 15 | 21 | 9  | 16 | 9  | 16 | 14 | 17 | 9  | 15 | 9  |
| High | Q9P258 | Protein RCC2 OS=Homo sapiens OX=9606 GN=RCC2 PE=1 SV=2                                                             | 162 | 17 | 17 | 56    | 37 | 522  | 8.78  | 16 | 15 | 18 | 16 | 17 | 16 | 13 | 13 | 12 | 11 | 12 | 13 |
| High | P12126 | Glycogen phosphorylase, brain form OS=Homo sapiens OX=9606 GN=PYGB PE=1 SV=5                                       | 161 | 32 | 32 | 96.6  | 42 | 843  | 6.86  | 29 | 29 | 25 | 8  | 8  | 9  | 27 | 28 | 23 | 8  | 8  | 4  |
| High | Q95678 | SWISS-PROT:Q95678 Tax_id=9606 Gene_Symbol=KRT75 Keratin, type II cytoskeletal 75                                   | 161 | 10 | 1  | 59.5  | 13 | 551  | 7.74  | 22 | 28 | 45 | 9  | 11 | 10 | 7  | 7  | 10 | 4  | 4  | 4  |
| High | P17987 | T-complex protein 1 subunit alpha OS=Homo sapiens OX=9606 GN=TCF1 PE=1 SV=1                                        | 161 | 23 | 23 | 60.3  | 51 | 556  | 6.11  | 22 | 22 | 25 | 11 | 11 | 10 | 20 | 19 | 22 | 11 | 11 | 10 |
| High | P23252 | Adenovirus hexon OS=Homo sapiens OX=9606 GN=ADCV PE=1 SV=4                                                         | 161 | 20 | 30 | 144.4 | 93 | 1262 | 6.35  | 17 | 14 | 17 | 16 | 11 | 15 | 16 | 18 | 11 | 14 | 14 | 13 |
| High | P05023 | Sodium/potassium-transporting ATPase subunit alpha-1 OS=Homo sapiens OX=9606 GN=ATP1A1 PE=1 SV=1                   | 160 | 28 | 28 | 112.8 | 33 | 1023 | 4.49  | 17 | 18 | 18 | 13 | 15 | 14 | 16 | 18 | 15 | 11 | 13 | 13 |
| High | Q72383 | KAT8 regulatory NSL complex subunit 1 OS=Homo sapiens OX=9606 GN=KANSL1 PE=1 SV=2                                  | 158 | 31 | 31 | 121   | 42 | 1105 | 8.81  | 23 | 23 | 28 | 23 | 28 | 23 | 17 | 19 | 23 | 19 | 23 | 19 |
| High | P14868 | Aspartate--tRNA ligase, cytoplasmic OS=Homo sapiens OX=9606 GN=DARS1 PE=1 SV=2                                     | 158 | 27 | 27 | 57.1  | 60 | 501  | 6.55  | 16 | 14 | 18 | 16 | 15 | 13 | 16 | 13 | 17 | 16 | 15 | 13 |
| High | Q11837 | DNA topoisomerase 1 OS=Homo sapiens OX=9606 GN=TOP1 PE=1 SV=2                                                      | 158 | 25 | 25 | 90.7  | 32 | 765  | 9.31  | 13 | 14 | 14 | 16 | 18 | 16 | 13 | 13 | 15 | 16 | 14 | 14 |
| High | Q01813 | ATP-dependent 6-phosphofruktokinase, platelet type OS=Homo sapiens OX=9606 GN=PFKFB PE=1 SV=2                      | 156 | 26 | 22 | 85.5  | 41 | 784  | 7.55  | 24 | 22 | 8  | 11 | 8  | 22 | 21 | 19 | 8  | 10 | 8  | 8  |
| High | Q00571 | ATP-dependent RNA helicase DDX33 OS=Homo sapiens OX=9606 GN=DDX33 PE=1 SV=3                                        | 155 | 26 | 25 | 73.2  | 45 | 662  | 7.18  | 20 | 22 | 17 | 13 | 16 | 14 | 17 | 17 | 14 | 12 | 14 | 12 |
| High | Q15365 | Poly(rC)-binding protein 1 OS=Homo sapiens OX=9606 GN=PCBP1 PE=1 SV=2                                              | 154 | 13 | 9  | 37.5  | 61 | 356  | 7.09  | 13 | 13 | 15 | 17 | 17 | 17 | 11 | 11 | 10 | 9  | 9  | 9  |
| High | P30740 | Leukocyte elastase inhibitor OS=Homo sapiens OX=9606 GN=SERPINB1 PE=1 SV=1                                         | 154 | 19 | 18 | 42.7  | 53 | 379  | 6.28  | 16 | 15 | 19 | 15 | 14 | 12 | 16 | 15 | 14 | 11 | 7  | 11 |
| High | P06748 | Nucleophosmin OS=Homo sapiens OX=9606 GN=NPM1 PE=1 SV=2                                                            | 153 | 11 | 11 | 32.6  | 52 | 294  | 4.78  | 17 | 13 | 15 | 5  | 14 | 7  | 8  | 7  | 7  | 7  | 7  | 5  |
| High | P62701 | 40S ribosomal protein S4, X isoform OS=Homo sapiens OX=9606 GN=RP54N PE=1 SV=2                                     | 152 | 16 | 16 | 29.6  | 51 | 263  | 10.15 | 17 | 15 | 15 | 15 | 17 | 16 | 13 | 12 | 13 | 10 | 13 | 9  |
| High | Q14639 | Actin-binding LIM protein 1 OS=Homo sapiens OX=9606 GN=ABLIM1 PE=1 SV=3                                            | 152 | 25 | 25 | 87.6  | 38 | 778  | 8.59  | 21 | 25 | 23 | 8  | 9  | 6  | 18 | 18 | 17 | 8  | 7  | 6  |
| High | Q03164 | Histone-lysine N-methyltransferase 2A OS=Homo sapiens OX=9606 GN=KMT2A PE=1 SV=5                                   | 151 | 45 | 41 | 431.5 | 16 | 3969 | 9.09  | 24 | 22 | 30 | 24 | 30 | 24 | 21 | 22 | 27 | 22 | 24 | 24 |
| High | Q5QNW6 | Histone H2B type 2-F OS=Homo sapiens OX=9606 GN=H2BC18 PE=1 SV=3                                                   | 150 | 5  | 2  | 13.9  | 36 | 126  | 10.32 | 22 | 17 | 26 | 12 | 11 | 11 | 4  | 4  | 5  | 5  | 5  | 5  |
| High | Q12427 | Src substrate cortactin OS=Homo sapiens OX=9606 GN=CTTN PE=1 SV=2                                                  | 150 | 20 | 20 | 61.5  | 41 | 550  | 5.4   | 17 | 14 | 15 | 12 | 15 | 15 | 15 | 13 | 12 | 11 | 15 | 14 |
| High | P09874 | Poly (ADP-ribose) polymerase 1 OS=Homo sapiens OX=9606 GN=PARP1 PE=1 SV=4                                          | 147 | 29 | 29 | 113   | 35 | 1014 | 8.88  | 17 | 16 | 20 | 13 | 14 | 13 | 16 | 16 | 17 | 13 | 14 | 13 |
| High | Q9UJ72 | Annexin A10 OS=Homo sapiens OX=9606 GN=ANXA10 PE=1 SV=3                                                            | 146 | 17 | 17 | 37.3  | 66 | 324  | 5.33  | 17 | 17 | 14 | 8  | 11 | 8  | 14 | 14 | 12 | 7  | 8  | 7  |
| High | Q71576 | Cytoplasmic FMR1-interacting protein 1 OS=Homo sapiens OX=9606 GN=CYFIP1 PE=1 SV=1                                 | 146 | 29 | 29 | 145.1 | 27 | 1253 | 6.9   | 20 | 22 | 21 | 9  | 8  | 10 | 17 | 19 | 16 | 9  | 8  | 10 |
| High | P52907 | F-actin-capping protein subunit alpha-1 OS=Homo sapiens OX=9606 GN=CAPZA1 PE=1 SV=3                                | 146 | 12 | 10 | 32.9  | 65 | 286  | 5.69  | 15 | 12 | 16 | 5  | 7  | 7  | 9  | 6  | 10 | 4  | 6  | 5  |
| High | P85037 | Forhead box protein K1 OS=Homo sapiens OX=9606 GN=FOXK1 PE=1 SV=1                                                  | 145 | 21 | 19 | 75.4  | 31 | 733  | 9.32  | 5  | 4  | 3  | 19 | 19 | 19 | 5  | 4  | 3  | 15 | 17 | 14 |
| High | P55265 | Double-stranded RNA-specific adenosine deaminase OS=Homo sapiens OX=9606 GN=ADAR PE=1 SV=4                         | 145 | 29 | 29 | 136   | 29 | 1226 | 8.65  | 11 | 12 | 10 | 16 | 17 | 18 | 11 | 12 | 10 | 16 | 15 | 17 |
| High | Q41252 | Isolectin--B4 OS=Homo sapiens OX=9606 GN=IB4 PE=1 SV=2                                                             | 145 | 30 | 30 | 144.4 | 31 | 1262 | 6.15  | 17 | 14 | 17 | 9  | 7  | 7  | 17 | 14 | 16 | 9  | 7  | 9  |
| High | P10599 | Thioredoxin OS=Homo sapiens OX=9606 GN=TXN PE=1 SV=3                                                               | 144 | 5  | 5  | 11.7  | 50 | 105  | 4.92  | 12 | 16 | 17 | 10 | 23 | 9  | 4  | 5  | 5  | 4  | 4  | 3  |
| High | P37802 | Transgelin-2 OS=Homo sapiens OX=9606 GN=TAGLN2 PE=1 SV=3                                                           | 144 | 13 | 13 | 22.4  | 74 | 199  | 8.25  | 16 | 12 | 12 | 16 | 15 | 12 | 12 | 10 | 9  | 9  | 9  | 8  |
| High | P56470 | Galectin-4 OS=Homo sapiens OX=9606 GN=LGALS4 PE=1 SV=1                                                             | 144 | 11 | 11 | 35.9  | 35 | 323  | 9.16  | 17 | 17 | 20 | 6  | 5  | 8  | 9  | 9  | 10 | 5  | 3  | 5  |
| High | A49915 | GMP synthase [glutamine-hydrolyzing] OS=Homo sapiens OX=9606 GN=GMPSS PE=1 SV=1                                    | 143 | 26 | 26 | 76.7  | 48 | 693  | 6.87  | 20 | 18 | 17 | 11 | 12 | 8  | 17 | 16 | 14 | 10 | 10 | 8  |
| High | P33992 | DNA replication licensing factor MCM5 OS=Homo sapiens OX=9606 GN=MCM5 PE=1 SV=5                                    | 142 | 28 | 28 | 82.2  | 44 | 734  | 8.37  | 14 | 9  | 15 | 9  | 18 | 10 | 14 | 8  | 15 | 9  | 16 | 10 |
| High | P06576 | ATP synthase subunit beta, mitochondrial OS=Homo sapiens OX=9606 GN=ATP5F1B PE=1 SV=3                              | 141 | 22 | 22 | 56.5  | 62 | 529  | 5.4   | 22 | 23 | 25 | 12 | 11 | 13 | 17 | 18 | 20 | 10 | 9  | 11 |
| High | P63104 | 14-3-3 protein zeta/delta OS=Homo sapiens OX=9606 GN=YWHAZ PE=1 SV=1                                               | 140 | 14 | 11 | 27.7  | 62 | 245  | 4.79  | 15 | 15 | 16 | 7  | 15 | 12 | 11 | 11 | 10 | 7  | 9  | 7  |
| High | Q16778 | Histone H2B type 2-E OS=Homo sapiens OX=9606 GN=H2BC21 PE=1 SV=3                                                   | 140 | 5  | 2  | 13.9  | 36 | 126  | 10.32 | 20 | 16 | 26 | 11 | 10 | 10 | 4  | 5  | 5  | 5  | 5  | 5  |
| High | Q61F42 | SWISS-PROT:Q61F42 Tax_id=10090 Gene_Symbol=Krt42 Keratin, type I cytoskeletal 42                                   | 140 | 11 | 1  | 50.1  | 18 | 452  | 16.27 | 27 | 27 | 32 | 8  | 14 | 7  | 9  | 9  | 11 | 4  | 6  | 4  |
| High | P53618 | Coatomer subunit beta OS=Homo sapiens OX=9606 GN=COPIB1 PE=1 SV=3                                                  | 138 | 28 | 28 | 107.1 | 41 | 953  | 6.05  | 26 | 27 | 25 | 16 | 7  | 2  | 22 | 21 | 5  | 6  | 2  | 2  |
| High | P61247 | 40S ribosomal protein S3a OS=Homo sapiens OX=9606 GN=RP3A PE=1 SV=2                                                | 137 | 16 | 16 | 29.9  | 53 | 264  | 9.73  | 11 | 9  | 11 | 13 | 15 | 15 | 9  | 7  | 10 | 12 | 12 | 13 |
| High | Q92560 | Ubiquitin carboxyl-terminal hydrolase BAP1 OS=Homo sapiens OX=9606 GN=BAP1 PE=1 SV=2                               | 137 | 25 | 25 | 80.3  | 48 | 729  | 6.84  | 10 | 11 | 15 | 15 | 23 | 17 | 12 | 13 | 13 | 15 | 15 | 13 |
| High | P62258 | 14-3-3 protein epsilon OS=Homo sapiens OX=9606 GN=YWHAQ PE=1 SV=1                                                  | 137 | 16 | 13 | 29.2  | 59 | 255  | 4.74  | 14 | 16 | 18 | 10 | 12 | 13 | 12 | 12 | 10 | 10 | 11 | 11 |
| High | Q14974 | Protein phosphatase 1 regulatory subunit 12A OS=Homo sapiens OX=9606 GN=PPP1R12A PE=1 SV=1                         | 136 | 22 | 22 | 115.2 | 26 | 1030 | 5.4   | 14 | 11 | 19 | 12 | 11 | 11 | 12 | 10 | 16 | 10 | 11 | 11 |
| High | P27348 | 14-3-3 protein theta OS=Homo sapiens OX=9606 GN=YWHAQ PE=1 SV=1                                                    | 136 | 12 | 8  | 27.7  | 53 | 245  | 4.78  | 14 | 15 | 16 | 11 | 14 | 14 | 8  | 9  | 8  | 8  | 7  | 8  |
| High | P39023 | 60S ribosomal protein L3 OS=Homo sapiens OX=9606 GN=RPL3 PE=1 SV=2                                                 | 135 | 15 | 15 | 46.1  | 40 | 403  | 10.18 | 13 | 12 | 15 | 7  | 10 | 10 | 10 | 10 | 11 | 7  | 8  | 9  |
| High | P12814 | Alpha-actinin-1 OS=Homo sapiens OX=9606 GN=ACTN1 PE=1 SV=2                                                         | 135 | 23 | 10 | 103   | 32 | 892  | 5.41  | 22 | 29 | 24 | 5  | 7  | 6  | 16 | 20 | 17 | 5  | 6  | 6  |
| High | Q04843 | Dolichyl-diphosphooligosaccharide--protein glycosyltransferase subunit 1 OS=Homo sapiens OX=9606 GN=RPNI PE=1 SV=1 | 135 | 25 | 25 | 68.5  | 52 | 607  | 6.38  | 17 | 22 | 21 | 8  | 9  | 8  | 17 | 21 | 18 | 8  | 8  | 8  |
| High | Q92597 | Protein NDRG1 OS=Homo sapiens OX=9606 GN=NDRG1 PE=1 SV=1                                                           | 135 | 11 | 11 | 42.8  | 54 | 394  | 5.82  | 16 | 20 | 13 | 8  | 11 | 7  | 11 | 11 | 8  | 6  | 5  | 5  |
| High | Q94973 | AP-2 complex subunit alpha-2 OS=Homo sapiens OX=9606 GN=AP2A2 PE=1 SV=2                                            | 134 | 28 | 18 | 103.9 | 40 | 939  | 6.36  | 16 | 17 | 16 | 5  | 7  | 7  | 15 | 16 | 16 | 5  | 7  | 5  |
| High | P25705 | ATP synthase subunit alpha, mitochondrial OS=Homo sapiens OX=9606 GN=ATP5F1A PE=1 SV=1                             | 134 | 19 | 19 | 59.7  | 46 | 553  | 13.13 | 22 | 21 | 22 | 7  | 10 | 11 | 17 | 17 | 17 | 7  | 10 | 10 |
| High | P05141 | ADP/ATP translocase 2 OS=Homo sapiens OX=9606 GN=SLC25A5 PE=1 SV=7                                                 | 133 | 16 | 6  | 32.8  | 51 | 298  | 6.69  | 16 | 15 | 15 | 6  | 11 | 8  | 12 | 13 | 10 | 6  | 10 | 6  |
| High | P35080 | Profilin-2 OS=Homo sapiens OX=9606 GN=PFN2 PE=1 SV=3                                                               | 133 | 5  | 5  | 15    | 36 | 140  | 6.99  | 10 | 11 | 15 | 10 | 15 | 10 | 4  | 4  | 4  | 3  | 5  | 4  |
| High | Q95789 | Zinc finger MYM-type protein 6 OS=Homo sapiens OX=9606 GN=ZMYM6 PE=1 SV=2                                          | 133 | 40 | 40 | 148   | 36 | 1325 | 8.22  | 10 | 11 | 15 | 10 | 15 | 10 | 4  | 4  | 4  | 3  | 5  | 4  |
| High | P46013 | Proliferation marker protein Ki-67 OS=Homo sapiens OX=9606 GN=MKI67 PE=1 SV=2                                      | 132 | 37 | 37 | 358.5 | 17 | 3256 | 9.45  | 8  | 8  | 14 | 12 | 13 | 14 | 8  | 8  | 13 | 12 | 13 | 14 |
| High | Q43390 | Heterogeneous nuclear ribonucleoprotein R OS=Homo sapiens OX=9606 GN=HNRNPR PE=1 SV=1                              | 131 | 21 | 15 | 70.9  | 39 | 633  | 8.13  | 13 | 14 | 18 | 8  | 12 | 12 | 13 | 14 | 16 | 8  | 12 | 12 |
| High | P38159 | RNA-binding motif protein, X chromosome OS=Homo sapiens OX=9606 GN=RBMX PE=1 SV=3                                  | 130 | 16 | 4  | 42.3  | 41 | 391  | 10.05 | 13 | 16 | 21 | 10 | 12 | 13 | 11 | 13 | 15 | 10 | 10 | 11 |
| High | P34932 | Heat shock 70 kDa protein 4 OS=Homo sapiens OX=9606 GN=HSPA4 PE=1 SV=4                                             | 130 | 26 | 25 | 94.3  | 44 | 840  | 5.19  | 10 | 13 | 18 | 8  | 7  | 7  | 10 | 12 | 18 | 7  | 7  | 7  |
| High | P67809 | Y-box-binding protein 1 OS=Homo sapiens OX=9606 GN=YBX1 PE=1 SV=3                                                  | 130 | 9  | 6  | 35.9  | 48 | 324  | 8.88  | 12 | 9  | 14 | 14 | 13 | 14 | 6  | 6  | 7  | 9  | 7  | 9  |
| High | Q92495 | Far upstream element-binding protein 1 OS=Homo sapiens OX=9606 GN=FXR1 PE=1 SV=4                                   | 130 | 20 | 20 | 75.3  | 49 | 620  | 5.59  | 23 | 20 | 26 | 7  | 8  | 7  | 16 | 16 | 20 | 6  | 6  | 7  |
| High | P43243 | Matrix-3 OS=Homo sapiens OX=9606 GN=MATR3 PE=1 SV=2                                                                | 130 | 25 | 25 | 94.6  | 38 | 847  | 6.25  | 15 | 14 | 16 | 11 | 10 | 11 | 16 | 13 | 15 | 10 | 10 | 9  |
| High | P0DP25 | Calmodulin-3 OS=Homo sapiens OX=9606 GN=CALM3 PE=1 SV=1                                                            | 130 | 9  | 9  | 16.8  | 52 | 149  | 4.22  | 15 | 17 | 15 | 7  | 13 | 6  | 8  | 8  | 7  | 7  | 7  | 6  |
| High | P17812 | CTP synthase 1 OS=Homo sapiens OX=9606 GN=CTSP1 PE=1 SV=2                                                          | 130 | 19 | 18 | 66.6  | 46 | 591  | 6.46  | 18 | 13 | 15 | 12 | 12 | 12 | 17 | 12 | 13 | 11 | 10 | 11 |
| High | P09651 | Heterogeneous nuclear ribonucleoprotein A1 OS=Homo sapiens OX=9606 GN=HNRNPA1 PE=1 SV=5                            | 130 | 16 | 14 | 38    |    |      |       |    |    |    |    |    |    |    |    |    |    |    |    |

|      |        |                                                                                                                          |    |    |    |       |    |      |       |    |    |    |    |    |    |    |    |    |    |    |    |
|------|--------|--------------------------------------------------------------------------------------------------------------------------|----|----|----|-------|----|------|-------|----|----|----|----|----|----|----|----|----|----|----|----|
| High | Q9UHX1 | Poly(U)-binding-splicing factor PUF60 OS=Homo sapiens OX=9606 GN=PUF60 PE=1 SV=1                                         | 98 | 14 | 14 | 59.8  | 35 | 559  | 5.29  | 8  | 7  | 9  | 9  | 11 | 10 | 8  | 7  | 9  | 8  | 10 | 10 |
| High | Q43684 | Mitotic checkpoint protein BUB3 OS=Homo sapiens OX=9606 GN=BUB3 PE=1 SV=1                                                | 97 | 11 | 11 | 37.1  | 35 | 328  | 6.84  | 5  | 5  | 4  | 15 | 18 | 13 | 5  | 5  | 4  | 11 | 11 | 9  |
| High | Q9Y310 | RNA-splicing ligase RtcB homolog OS=Homo sapiens OX=9606 GN=RtcB PE=1 SV=1                                               | 97 | 19 | 19 | 55.2  | 45 | 505  | 7.23  | 12 | 10 | 15 | 6  | 9  | 6  | 12 | 9  | 13 | 6  | 9  | 6  |
| High | P33993 | DNA replication licensing factor MCM7 OS=Homo sapiens OX=9606 GN=MCM7 PE=1 SV=4                                          | 97 | 26 | 26 | 81.3  | 45 | 719  | 6.46  | 20 | 20 | 15 | 3  | 6  | 4  | 17 | 19 | 14 | 3  | 6  | 4  |
| High | P27694 | Replication protein A 70 kDa DNA-binding subunit OS=Homo sapiens OX=9606 GN=RP1A PE=1 SV=2                               | 97 | 25 | 25 | 68.1  | 44 | 616  | 7.21  | 20 | 18 | 22 | 6  | 6  | 6  | 19 | 18 | 21 | 6  | 6  | 6  |
| High | Q13310 | Polyadenylate-binding protein 4 OS=Homo sapiens OX=9606 GN=PABPC4 PE=1 SV=1                                              | 96 | 17 | 11 | 70.7  | 29 | 644  | 9.26  | 7  | 7  | 8  | 8  | 12 | 11 | 7  | 7  | 8  | 8  | 11 | 10 |
| High | P04406 | Glyceraldehyde-3-phosphate dehydrogenase OS=Homo sapiens OX=9606 GN=GAPDH PE=1 SV=3                                      | 96 | 11 | 11 | 36    | 43 | 335  | 8.46  | 13 | 14 | 17 | 5  | 5  | 5  | 9  | 10 | 5  | 4  | 5  | 5  |
| High | P14866 | Heterogeneous nuclear ribonucleoprotein L OS=Homo sapiens OX=9606 GN=HNRNPL PE=1 SV=2                                    | 96 | 18 | 17 | 64.1  | 48 | 589  | 8.22  | 8  | 9  | 10 | 5  | 15 | 8  | 7  | 9  | 10 | 5  | 14 | 8  |
| High | Q96243 | Histone H3.3 OS=Homo sapiens OX=9606 GN=H3.3 PE=1 SV=2                                                                   | 95 | 19 | 17 | 63.1  | 41 | 336  | 9.44  | 4  | 7  | 8  | 12 | 7  | 14 | 2  | 6  | 3  | 10 | 11 | 9  |
| High | P50402 | Emerin OS=Homo sapiens OX=9606 GN=EMD PE=1 SV=1                                                                          | 95 | 13 | 13 | 39    | 73 | 254  | 8.5   | 16 | 17 | 10 | 5  | 6  | 5  | 12 | 13 | 6  | 6  | 4  | 4  |
| High | P07237 | Protein disulfide-isomerase OS=Homo sapiens OX=9606 GN=PI4HBP PE=1 SV=3                                                  | 95 | 20 | 20 | 57.1  | 42 | 508  | 4.87  | 10 | 10 | 14 | 3  | 7  | 3  | 8  | 9  | 5  | 3  | 7  | 3  |
| High | P18621 | 60S ribosomal protein L17 OS=Homo sapiens OX=9606 GN=RPL17 PE=1 SV=3                                                     | 95 | 7  | 7  | 21.4  | 42 | 184  | 10.17 | 8  | 9  | 11 | 6  | 6  | 5  | 6  | 6  | 5  | 4  | 4  | 3  |
| High | P00338 | L-lactate dehydrogenase chain A OS=Homo sapiens OX=9606 GN=LDAH PE=1 SV=2                                                | 95 | 14 | 13 | 36.7  | 52 | 332  | 8.27  | 14 | 16 | 16 | 4  | 8  | 4  | 10 | 12 | 11 | 4  | 8  | 3  |
| High | Q9U150 | Calcium-binding mitochondrial carrier protein Aralar2 OS=Homo sapiens OX=9606 GN=SLC25A13 PE=1 SV=2                      | 95 | 20 | 15 | 74.1  | 38 | 675  | 8.62  | 13 | 15 | 19 | 3  | 7  | 6  | 13 | 15 | 17 | 3  | 7  | 6  |
| High | Q13428 | Treacle protein OS=Homo sapiens OX=9606 GN=TCOF1 PE=1 SV=3                                                               | 95 | 20 | 20 | 152   | 16 | 1488 | 9.04  | 5  | 6  | 7  | 11 | 10 | 10 | 5  | 5  | 7  | 11 | 9  | 10 |
| High | P05388 | 60S acidic ribosomal protein P0 OS=Homo sapiens OX=9606 GN=RPLP0 PE=1 SV=1                                               | 94 | 8  | 8  | 34.3  | 28 | 317  | 5.97  | 8  | 8  | 9  | 10 | 7  | 11 | 7  | 7  | 7  | 6  | 7  | 6  |
| High | Q7RT57 | SWISS-PROT:Q7RT57 Tax_id=9606 Gene_Symbol=KRT74 Keratin, type II cytoskeletal 74                                         | 94 | 5  | 1  | 57.8  | 7  | 529  | 7.71  | 12 | 17 | 30 | 5  | 6  | 7  | 3  | 3  | 5  | 2  | 3  | 2  |
| High | P07947 | Tyrosine protein kinase Yes OS=Homo sapiens OX=9606 GN=YES1 PE=1 SV=3                                                    | 94 | 18 | 10 | 60.8  | 39 | 543  | 6.74  | 8  | 9  | 10 | 8  | 6  | 8  | 7  | 7  | 7  | 7  | 5  | 8  |
| High | Q9ULV4 | Coronin-1C OS=Homo sapiens OX=9606 GN=COR1C PE=1 SV=1                                                                    | 94 | 18 | 17 | 53.2  | 46 | 474  | 7.08  | 16 | 12 | 15 | 4  | 5  | 4  | 13 | 11 | 13 | 4  | 5  | 4  |
| High | P31629 | Transcription factor HIVEP2 OS=Homo sapiens OX=9606 GN=HIVEP2 PE=1 SV=2                                                  | 94 | 36 | 33 | 268.9 | 18 | 2466 | 6.96  | 23 | 27 | 24 | 7  | 7  | 24 | 7  | 7  | 23 | 27 | 23 | 23 |
| High | Q32M24 | Leucine-rich repeat flightless-interacting protein 1 OS=Homo sapiens OX=9606 GN=LRFIP1 PE=1 SV=2                         | 94 | 15 | 14 | 89.2  | 27 | 808  | 4.65  | 8  | 7  | 11 | 4  | 10 | 7  | 8  | 11 | 9  | 6  | 8  | 7  |
| High | P09661 | U2 small nuclear ribonucleoprotein A' OS=Homo sapiens OX=9606 GN=SNRPA1 PE=1 SV=2                                        | 94 | 12 | 12 | 28.4  | 47 | 255  | 8.62  | 3  | 2  | 1  | 13 | 18 | 13 | 3  | 2  | 1  | 10 | 10 | 8  |
| High | P08865 | 40S ribosomal protein SA OS=Homo sapiens OX=9606 GN=RPSA PE=1 SV=1                                                       | 93 | 10 | 10 | 32.8  | 52 | 295  | 4.87  | 11 | 10 | 11 | 6  | 7  | 7  | 9  | 9  | 7  | 5  | 6  | 6  |
| High | Q15437 | Protein transport protein Sec23B OS=Homo sapiens OX=9606 GN=SEC23B PE=1 SV=2                                             | 93 | 16 | 13 | 86.4  | 26 | 767  | 6.89  | 11 | 11 | 12 | 7  | 7  | 8  | 10 | 11 | 12 | 7  | 7  | 7  |
| High | Q14151 | Scaffold attachment factor B2 OS=Homo sapiens OX=9606 GN=SAFB2 PE=1 SV=1                                                 | 93 | 18 | 11 | 107.4 | 25 | 953  | 6.16  | 13 | 17 | 15 | 4  | 4  | 6  | 11 | 13 | 12 | 4  | 3  | 5  |
| High | P02769 | SWISS-PROT:P02769 (Bos taurus) Bovine serum albumin precursor                                                            | 92 | 20 | 16 | 69.2  | 39 | 607  | 6.18  | 5  | 18 | 3  | 10 | 13 | 9  | 5  | 13 | 3  | 9  | 11 | 8  |
| High | Q04917 | 14-3-3 protein eta OS=Homo sapiens OX=9606 GN=YWHAH PE=1 SV=4                                                            | 92 | 12 | 8  | 28.2  | 49 | 246  | 4.84  | 9  | 12 | 8  | 9  | 9  | 9  | 7  | 6  | 6  | 5  | 6  | 6  |
| High | P31040 | Succinate dehydrogenase [ubiquinone] flavoprotein subunit, mitochondrial OS=Homo sapiens OX=9606 GN=SDHA PE=1 SV=2       | 92 | 18 | 18 | 72.6  | 33 | 664  | 7.39  | 11 | 11 | 12 | 4  | 11 | 8  | 11 | 11 | 10 | 4  | 11 | 8  |
| High | Q95372 | Acyl-protein thioesterase 2 OS=Homo sapiens OX=9606 GN=VPLA2 PE=1 SV=1                                                   | 92 | 9  | 9  | 24.7  | 52 | 231  | 7.23  | 11 | 14 | 12 | 3  | 7  | 4  | 7  | 8  | 8  | 3  | 6  | 4  |
| High | Q95793 | Double-stranded RNA-binding protein Staufen homolog 1 OS=Homo sapiens OX=9606 GN=STAU1 PE=1 SV=2                         | 91 | 19 | 17 | 63.1  | 41 | 577  | 8.44  | 4  | 7  | 8  | 10 | 11 | 9  | 3  | 6  | 10 | 11 | 9  | 3  |
| High | P31947 | 14-3-3 protein sigma OS=Homo sapiens OX=9606 GN=SFN PE=1 SV=1                                                            | 91 | 12 | 8  | 27.8  | 53 | 248  | 4.74  | 7  | 10 | 13 | 7  | 6  | 7  | 5  | 7  | 7  | 6  | 4  | 4  |
| High | Q07666 | KH domain-containing, RNA-binding, signal transduction-associated protein 1 OS=Homo sapiens OX=9606 GN=KHDRB51 PE=1 SV=1 | 91 | 7  | 7  | 48.2  | 24 | 443  | 8.66  | 10 | 6  | 11 | 9  | 5  | 11 | 6  | 4  | 7  | 5  | 5  | 5  |
| High | Q43795 | Unconventional myosin-III OS=Homo sapiens OX=9606 GN=MYO1B PE=1 SV=3                                                     | 91 | 29 | 29 | 131.9 | 30 | 1136 | 9.38  | 10 | 10 | 12 | 2  | 1  | 2  | 10 | 9  | 12 | 2  | 1  | 2  |
| High | Q08J23 | RNA cytosine (C)5-methyltransferase NSUN2 OS=Homo sapiens OX=9606 GN=NSUN2 PE=1 SV=2                                     | 90 | 22 | 22 | 86.4  | 40 | 767  | 6.77  | 11 | 10 | 11 | 6  | 11 | 9  | 10 | 9  | 8  | 6  | 10 | 9  |
| High | Q9NQX4 | Unconventional myosin-Vc OS=Homo sapiens OX=9606 GN=MYO5C PE=1 SV=2                                                      | 90 | 27 | 23 | 202.7 | 17 | 1742 | 7.71  | 8  | 11 | 11 | 2  | 3  | 3  | 7  | 11 | 9  | 12 | 2  | 3  |
| High | P63279 | SUMO-conjugating enzyme UBC9 OS=Homo sapiens OX=9606 GN=UBE2I PE=1 SV=1                                                  | 90 | 7  | 7  | 18    | 34 | 158  | 8.66  | 5  | 6  | 5  | 5  | 5  | 3  | 4  | 4  | 4  | 3  | 3  | 2  |
| High | Q14254 | Fliotillin-2 OS=Homo sapiens OX=9606 GN=FLOT2 PE=1 SV=2                                                                  | 90 | 15 | 15 | 47    | 44 | 428  | 5.25  | 12 | 11 | 11 | 2  | 2  | 2  | 11 | 11 | 10 | 2  | 2  | 2  |
| High | P55196 | Afadin OS=Homo sapiens OX=9606 GN=AFDN PE=1 SV=3                                                                         | 90 | 30 | 30 | 206.7 | 23 | 1824 | 6.47  | 11 | 14 | 15 | 4  | 5  | 3  | 11 | 14 | 15 | 4  | 5  | 3  |
| High | Q00468 | Aggrin OS=Homo sapiens OX=9606 GN=AGRN PE=1 SV=6                                                                         | 89 | 27 | 27 | 217.2 | 19 | 2068 | 6.39  | 10 | 8  | 4  | 6  | 8  | 4  | 8  | 6  | 4  | 5  | 8  | 3  |
| High | P31330 | Cytochrome b-c1 complex subunit 1, mitochondrial OS=Homo sapiens OX=9606 GN=CYTB PE=1 SV=1                               | 89 | 19 | 8  | 17.7  | 33 | 156  | 10.45 | 6  | 8  | 9  | 13 | 16 | 6  | 5  | 7  | 6  | 6  | 5  | 8  |
| High | P55192 | Methionine-tRNA ligase, cytoplasmic OS=Homo sapiens OX=9606 GN=MASS1 PE=1 SV=2                                           | 88 | 18 | 18 | 101.1 | 25 | 900  | 6.16  | 10 | 9  | 13 | 1  | 4  | 2  | 9  | 8  | 12 | 1  | 4  | 2  |
| High | Q13057 | Bifunctional coenzyme A synthase OS=Homo sapiens OX=9606 GN=COASY PE=1 SV=4                                              | 88 | 16 | 16 | 62.3  | 35 | 564  | 6.99  | 7  | 9  | 12 | 6  | 8  | 7  | 7  | 9  | 11 | 6  | 8  | 7  |
| High | Q9HCC0 | Methylcrotonyl-CoA carboxylase beta chain, mitochondrial OS=Homo sapiens OX=9606 GN=MCCC2 PE=1 SV=1                      | 88 | 19 | 19 | 61.3  | 41 | 563  | 7.68  | 8  | 7  | 8  | 8  | 11 | 8  | 7  | 7  | 7  | 7  | 11 | 8  |
| High | P42167 | Lamina-associated polypeptide 2, isoforms beta/gamma OS=Homo sapiens OX=9606 GN=TMPO PE=1 SV=2                           | 88 | 12 | 7  | 50.6  | 41 | 454  | 9.38  | 12 | 12 | 10 | 8  | 7  | 6  | 10 | 9  | 8  | 8  | 7  | 6  |
| High | Q60547 | GDP-mannose 4,6 dehydroxylase OS=Homo sapiens OX=9606 GN=GMD5 PE=1 SV=1                                                  | 88 | 14 | 14 | 41.9  | 45 | 372  | 7.31  | 9  | 9  | 10 | 6  | 10 | 7  | 9  | 9  | 9  | 6  | 8  | 7  |
| High | Q9P0K7 | Ankyrin OS=Homo sapiens OX=9606 GN=ANK1 PE=1 SV=2                                                                        | 88 | 28 | 28 | 110   | 36 | 980  | 6.21  | 13 | 18 | 17 | 13 | 18 | 17 | 13 | 18 | 17 | 13 | 18 | 17 |
| High | Q6Y1N6 | Hydroxysteroid dehydrogenase-like protein 2 OS=Homo sapiens OX=9606 GN=HSDL2 PE=1 SV=1                                   | 88 | 17 | 17 | 45.4  | 50 | 418  | 7.99  | 11 | 10 | 9  | 4  | 5  | 4  | 9  | 9  | 7  | 4  | 5  | 4  |
| High | P12931 | Proto-oncogene tyrosine-protein kinase Src OS=Homo sapiens OX=9606 GN=SRC PE=1 SV=3                                      | 88 | 18 | 10 | 59.8  | 41 | 536  | 7.42  | 8  | 10 | 10 | 6  | 6  | 8  | 8  | 9  | 9  | 6  | 6  | 7  |
| High | P55786 | Puromycin-sensitive aminopeptidase OS=Homo sapiens OX=9606 GN=PEPP5 PE=1 SV=2                                            | 88 | 19 | 19 | 103.2 | 23 | 919  | 5.72  | 13 | 16 | 16 | 6  | 6  | 5  | 13 | 14 | 13 | 5  | 6  | 5  |
| High | P62750 | 60S ribosomal protein L2a OS=Homo sapiens OX=9606 GN=RPL2A PE=1 SV=1                                                     | 88 | 8  | 8  | 17.7  | 33 | 156  | 10.45 | 6  | 8  | 9  | 13 | 16 | 6  | 5  | 7  | 6  | 6  | 5  | 8  |
| High | Q9UPU5 | Ubiquitin carboxyl-terminal hydrolase 24 OS=Homo sapiens OX=9606 GN=USP24 PE=1 SV=3                                      | 88 | 29 | 29 | 294.2 | 14 | 2620 | 6.14  | 14 | 14 | 14 | 2  | 3  | 3  | 9  | 14 | 8  | 14 | 2  | 3  |
| High | Q99832 | T-complex protein 1 subunit eta OS=Homo sapiens OX=9606 GN=TCCT7 PE=1 SV=2                                               | 87 | 17 | 17 | 59.3  | 38 | 543  | 6.65  | 8  | 9  | 7  | 9  | 11 | 6  | 8  | 8  | 6  | 8  | 11 | 6  |
| High | Q96PK6 | RNA-binding protein 14 OS=Homo sapiens OX=9606 GN=RBM14 PE=1 SV=2                                                        | 87 | 17 | 17 | 69.4  | 30 | 669  | 9.67  | 13 | 11 | 16 | 6  | 7  | 7  | 10 | 8  | 14 | 6  | 6  | 7  |
| High | Q14677 | Clathrin interactor 1 OS=Homo sapiens OX=9606 GN=CLINT1 PE=1 SV=1                                                        | 87 | 14 | 14 | 68.2  | 28 | 625  | 6.42  | 5  | 7  | 8  | 3  | 3  | 2  | 5  | 7  | 8  | 3  | 3  | 2  |
| High | P22234 | Multifunctional protein ADE2 OS=Homo sapiens OX=9606 GN=PAICS PE=1 SV=3                                                  | 87 | 13 | 13 | 47    | 39 | 425  | 7.23  | 7  | 9  | 14 | 7  | 9  | 8  | 5  | 6  | 9  | 7  | 8  | 8  |
| High | Q9HBD1 | Roquin-2 OS=Homo sapiens OX=9606 GN=RC3H2 PE=1 SV=2                                                                      | 87 | 23 | 19 | 131.6 | 30 | 1191 | 6.89  | 6  | 6  | 17 | 16 | 16 | 16 | 15 | 14 | 15 | 14 | 15 | 15 |
| High | P05091 | Aldehyde dehydrogenase, mitochondrial OS=Homo sapiens OX=9606 GN=ALDH2 PE=1 SV=2                                         | 87 | 19 | 16 | 56.3  | 44 | 517  | 7.05  | 11 | 9  | 11 | 6  | 6  | 6  | 7  | 7  | 9  | 6  | 6  | 6  |
| High | Q9Y6K5 | 2'-5'-oligoadenylate synthase 3 OS=Homo sapiens OX=9606 GN=OAS3 PE=1 SV=3                                                | 87 | 21 | 21 | 121.1 | 24 | 1087 | 8.4   | 6  | 5  | 3  | 12 | 14 | 10 | 6  | 5  | 3  | 12 | 14 | 10 |
| High | Q88V96 | Cullin-associated NEDD8-dissociated protein 1 OS=Homo sapiens OX=9606 GN=CAND1 PE=1 SV=2                                 | 86 | 22 | 22 | 136.3 | 20 | 1230 | 5.88  | 8  | 12 | 10 | 6  | 7  | 4  | 8  | 11 | 10 | 6  | 7  | 6  |
| High | Q9P2J5 | Galectin-1 OS=Homo sapiens OX=9606 GN=GA1 PE=1 SV=1                                                                      | 86 | 24 | 24 | 134.6 | 24 | 1176 | 5.74  | 13 | 14 | 8  | 12 | 7  | 14 | 2  | 7  | 8  | 14 | 2  | 7  |
| High | P13489 | Ribonucleoside diphosphate kinase B OS=Homo sapiens OX=9606 GN=RNKB PE=1 SV=2                                            | 86 | 15 | 15 | 49.9  | 48 | 461  | 4.82  | 11 | 10 | 9  | 6  | 7  | 8  | 11 | 10 | 9  | 5  | 7  | 6  |
| High | Q99959 | Plakophilin-2 OS=Homo sapiens OX=9606 GN=PKP2 PE=1 SV=2                                                                  | 86 | 20 | 20 | 97.4  | 30 | 881  | 9.33  | 18 | 17 | 14 | 3  | 5  | 4  | 17 | 16 | 12 | 3  | 5  | 4  |
| High | P08754 | Guanine nucleotide-binding protein (G) subunit alpha-3 OS=Homo sapiens OX=9606 GN=GNAI3 PE=1 SV=3                        | 86 | 12 | 6  | 40.5  | 44 | 354  | 5.69  | 8  | 7  | 10 | 5  | 7  | 6  | 6  | 5  | 4  | 6  | 5  | 5  |
| High | P42704 | Leucine-rich proline motif-containing protein, mitochondrial OS=Homo sapiens OX=9606 GN=LRPPRC PE=1 SV=3                 | 85 | 25 | 25 | 157.8 | 21 | 1394 | 6.13  | 10 | 7  | 8  | 6  | 7  | 5  | 10 | 7  | 8  | 6  | 7  | 5  |
| High | P07195 | L-lactate dehydrogenase chain A OS=Homo sapiens OX=9606 GN=LDAH PE=1 SV=2                                                | 85 | 13 | 12 | 36.6  | 46 | 334  | 6.05  | 13 | 15 | 14 | 4  | 4  | 2  | 10 | 12 | 8  | 4  | 4  | 2  |
| High | Q60841 | Eukaryotic translation initiation factor 5B OS=Homo sapiens OX=9606 GN=EIF5B PE=1 SV=4                                   |    |    |    |       |    |      |       |    |    |    |    |    |    |    |    |    |    |    |    |

|      |        |                                                                                                                                |    |    |    |       |    |      |       |    |    |    |    |    |    |    |    |    |    |    |    |
|------|--------|--------------------------------------------------------------------------------------------------------------------------------|----|----|----|-------|----|------|-------|----|----|----|----|----|----|----|----|----|----|----|----|
| High | Q00148 | ATP-dependent RNA helicase DDX39A OS=Homo sapiens OX=9606 GN=DDX39A PE=1 SV=2                                                  | 68 | 12 | 4  | 49.1  | 34 | 427  | 5.68  | 10 | 8  | 13 | 5  | 6  | 4  | 9  | 8  | 11 | 4  | 6  | 4  |
| High | P09543 | 2',3'-cyclic-nucleotide 3'-phosphodiesterase OS=Homo sapiens OX=9606 GN=CNP PE=1 SV=2                                          | 68 | 15 | 15 | 47.5  | 34 | 421  | 9.07  | 5  | 5  | 9  | 7  | 6  | 9  | 5  | 5  | 8  | 7  | 6  | 9  |
| High | O15438 | ATP-binding cassette sub-family C member 3 OS=Homo sapiens OX=9606 GN=ABCC3 PE=1 SV=3                                          | 68 | 22 | 20 | 169.2 | 19 | 1527 | 7.2   | 17 | 20 | 18 | 7  | 1  | 14 | 17 | 15 | 18 | 1  | 1  | 1  |
| High | Q8M1G4 | Leucine-rich repeat-containing protein 47 OS=Homo sapiens OX=9606 GN=LRR47 PE=1 SV=1                                           | 68 | 14 | 14 | 63.4  | 30 | 583  | 8.28  | 7  | 5  | 8  | 6  | 6  | 4  | 7  | 5  | 8  | 6  | 6  | 4  |
| High | Q9Y2X3 | Nucleolar protein 58 OS=Homo sapiens OX=9606 GN=NOP58 PE=1 SV=1                                                                | 67 | 13 | 13 | 59.5  | 31 | 529  | 8.92  | 3  | 4  | 7  | 5  | 8  | 6  | 6  | 3  | 4  | 7  | 5  | 6  |
| High | Q15046 | Lysine-tRNA ligase OS=Homo sapiens OX=9606 GN=KARS1 PE=1 SV=3                                                                  | 67 | 13 | 13 | 68    | 25 | 597  | 6.35  | 10 | 4  | 8  | 5  | 5  | 5  | 10 | 4  | 7  | 5  | 5  | 5  |
| High | Q13263 | Transcription intermediary factor 1-beta OS=Homo sapiens OX=9606 GN=TRIM28 PE=1 SV=5                                           | 67 | 13 | 13 | 88.5  | 26 | 835  | 5.77  | 5  | 5  | 8  | 6  | 5  | 6  | 5  | 5  | 8  | 6  | 5  | 6  |
| High | P51114 | Fragile X mental retardation syndrome-related protein 1 OS=Homo sapiens OX=9606 GN=FXR1 PE=1 SV=3                              | 67 | 17 | 15 | 69.7  | 36 | 621  | 6.15  | 6  | 7  | 4  | 8  | 8  | 7  | 6  | 7  | 4  | 7  | 7  | 6  |
| High | Q43837 | Nucleolar protein 48 [N48] OS=Homo sapiens OX=9606 GN=N48 PE=1 SV=2                                                            | 67 | 14 | 14 | 42.2  | 37 | 325  | 8.65  | 5  | 3  | 6  | 5  | 6  | 6  | 4  | 3  | 8  | 7  | 8  | 7  |
| High | P60903 | Protein S100-A10 OS=Homo sapiens OX=9606 GN=S100A10 PE=1 SV=2                                                                  | 67 | 3  | 3  | 13.2  | 18 | 97   | 7.37  | 5  | 3  | 5  | 3  | 5  | 4  | 2  | 1  | 2  | 3  | 3  | 3  |
| High | Q6LXN9 | WD repeat-containing protein 82 OS=Homo sapiens OX=9606 GN=WD82 PE=1 SV=1                                                      | 67 | 11 | 11 | 35.1  | 35 | 313  | 7.69  | 1  | 1  | 1  | 10 | 12 | 11 | 1  | 1  | 1  | 1  | 8  | 9  |
| High | P61204 | ADP-ribosylation factor 3 OS=Homo sapiens OX=9606 GN=ARF3 PE=1 SV=2                                                            | 66 | 7  | 4  | 20.6  | 48 | 181  | 7.43  | 9  | 11 | 11 | 4  | 6  | 4  | 7  | 7  | 7  | 7  | 4  | 5  |
| High | P52789 | Hexokinase-2 OS=Homo sapiens OX=9606 GN=HK2 PE=1 SV=2                                                                          | 66 | 20 | 17 | 102.3 | 25 | 917  | 6.05  | 7  | 9  | 10 | 1  | 2  | 1  | 7  | 9  | 10 | 1  | 2  | 1  |
| High | P15170 | Eukaryotic peptide chain release factor GTP-binding subunit ERFA3 OS=Homo sapiens OX=9606 GN=GSPT1 PE=1 SV=1                   | 66 | 15 | 15 | 55.7  | 37 | 499  | 5.62  | 8  | 7  | 11 | 3  | 2  | 6  | 7  | 7  | 10 | 3  | 2  | 6  |
| High | Q15084 | Protein disulfide-isomerase A6 OS=Homo sapiens OX=9606 GN=PDIA6 PE=1 SV=1                                                      | 66 | 8  | 8  | 48.1  | 26 | 440  | 5.08  | 9  | 9  | 9  | 5  | 5  | 5  | 7  | 7  | 7  | 5  | 5  | 5  |
| High | O15231 | Zinc finger protein 185 OS=Homo sapiens OX=9606 GN=ZNF185 PE=1 SV=3                                                            | 65 | 18 | 18 | 73.5  | 35 | 689  | 7.01  | 10 | 8  | 9  | 2  | 3  | 4  | 10 | 8  | 9  | 2  | 3  | 4  |
| High | Q6XQNE | Nicotinate phosphoribosyltransferase OS=Homo sapiens OX=9606 GN=NPRT PE=1 SV=2                                                 | 65 | 11 | 11 | 57.5  | 33 | 538  | 6.68  | 6  | 4  | 9  | 6  | 7  | 7  | 6  | 4  | 9  | 6  | 5  | 7  |
| High | Q60264 | SWI/SNF-related matrix-associated actin-dependent regulator of chromatin subfamily A member 5 OS=Homo sapiens OX=9606 GN=SMAD5 | 65 | 18 | 18 | 121.8 | 18 | 1052 | 5.09  | 6  | 9  | 8  | 8  | 9  | 5  | 6  | 9  | 8  | 8  | 9  | 5  |
| High | Q9B0V0 | PHD finger protein 20 OS=Homo sapiens OX=9606 GN=PHF20 PE=1 SV=2                                                               | 65 | 18 | 18 | 115.3 | 23 | 1012 | 6.19  | 8  | 12 | 11 | 9  | 10 | 10 | 10 | 10 | 9  | 10 | 10 | 10 |
| High | Q14697 | Neutral alpha-glucosidase AB OS=Homo sapiens OX=9606 GN=GAAAB PE=1 SV=3                                                        | 65 | 20 | 20 | 106.8 | 25 | 944  | 6.14  | 8  | 12 | 11 | 2  | 2  | 4  | 8  | 12 | 11 | 2  | 2  | 4  |
| High | P62829 | 60S ribosomal protein L23 OS=Homo sapiens OX=9606 GN=RPL23 PE=1 SV=1                                                           | 65 | 5  | 5  | 14.9  | 44 | 140  | 10.51 | 4  | 7  | 3  | 4  | 7  | 5  | 3  | 4  | 3  | 5  | 4  | 4  |
| High | P36873 | Serine/threonine-protein phosphatase PP1-gamma catalytic subunit OS=Homo sapiens OX=9606 GN=PPP1CC PE=1 SV=1                   | 65 | 8  | 1  | 37    | 31 | 323  | 6.54  | 9  | 8  | 7  | 4  | 3  | 3  | 6  | 7  | 6  | 4  | 3  | 3  |
| High | P49589 | Cysteine-tRNA ligase, cytoplasmic OS=Homo sapiens OX=9606 GN=CARS1 PE=1 SV=3                                                   | 65 | 14 | 14 | 85.4  | 21 | 748  | 6.76  | 5  | 5  | 7  | 6  | 4  | 5  | 5  | 5  | 6  | 6  | 3  | 4  |
| High | P35222 | Catenin beta-1 OS=Homo sapiens OX=9606 GN=CTNNB1 PE=1 SV=1                                                                     | 65 | 13 | 9  | 85.4  | 18 | 781  | 5.86  | 10 | 9  | 8  | 2  | 3  | 2  | 8  | 9  | 8  | 2  | 3  | 2  |
| High | Q9UQ77 | Structural maintenance of chromosomes protein 3 OS=Homo sapiens OX=9606 GN=SMC3 PE=1 SV=2                                      | 65 | 22 | 22 | 141.5 | 22 | 1217 | 7.18  | 6  | 4  | 9  | 2  | 6  | 3  | 6  | 4  | 9  | 2  | 6  | 3  |
| High | P30050 | 60S ribosomal protein L12 OS=Homo sapiens OX=9606 GN=RPL12 PE=1 SV=1                                                           | 64 | 5  | 5  | 17.8  | 45 | 165  | 9.42  | 5  | 5  | 5  | 5  | 8  | 5  | 5  | 5  | 5  | 5  | 5  | 5  |
| High | Q75534 | Cold shock domain-containing protein E1 OS=Homo sapiens OX=9606 GN=CSD1 PE=1 SV=2                                              | 64 | 16 | 16 | 88.8  | 21 | 798  | 6.25  | 3  | 2  | 3  | 8  | 8  | 11 | 3  | 2  | 3  | 8  | 8  | 11 |
| High | P35813 | Protein phosphatase 1A OS=Homo sapiens OX=9606 GN=PP1A PE=1 SV=1                                                               | 64 | 7  | 4  | 42.4  | 23 | 382  | 5.36  | 6  | 8  | 7  | 6  | 5  | 7  | 4  | 4  | 6  | 3  | 2  | 4  |
| High | P62873 | Guanine nucleotide-binding protein G(I)/G(S)/G(T) subunit beta-1 OS=Homo sapiens OX=9606 GN=GNB1 PE=1 SV=3                     | 64 | 11 | 5  | 37.4  | 40 | 340  | 6     | 9  | 8  | 8  | 6  | 4  | 5  | 9  | 8  | 7  | 6  | 4  | 5  |
| High | P62888 | 60S ribosomal protein L30 OS=Homo sapiens OX=9606 GN=RPL30 PE=1 SV=2                                                           | 64 | 5  | 5  | 12.8  | 57 | 115  | 9.63  | 5  | 3  | 6  | 5  | 7  | 4  | 4  | 3  | 4  | 3  | 4  | 4  |
| High | Q13247 | Serine/arginine-rich splicing factor 6 OS=Homo sapiens OX=9606 GN=SRSF6 PE=1 SV=2                                              | 64 | 9  | 8  | 39.6  | 23 | 344  | 11.43 | 7  | 5  | 4  | 13 | 6  | 7  | 7  | 5  | 4  | 9  | 5  | 6  |
| High | P24752 | Acetyl-CoA acetyltransferase, mitochondrial OS=Homo sapiens OX=9606 GN=ACAT1 PE=1 SV=1                                         | 64 | 12 | 12 | 45.2  | 30 | 427  | 8.85  | 2  | 4  | 5  | 8  | 7  | 7  | 2  | 4  | 5  | 8  | 7  | 7  |
| High | P11166 | Solute carrier family 2, facilitated glucose transporter member 1 OS=Homo sapiens OX=9606 GN=SLC2A1 PE=1 SV=2                  | 64 | 7  | 7  | 54    | 12 | 492  | 8.72  | 10 | 10 | 11 | 2  | 4  | 5  | 6  | 4  | 6  | 2  | 3  | 4  |
| High | P23284 | Peptidyl-prolyl cis-trans isomerase B OS=Homo sapiens OX=9606 GN=PPIB PE=1 SV=2                                                | 64 | 12 | 12 | 23.7  | 50 | 216  | 9.41  | 8  | 7  | 7  | 9  | 9  | 8  | 8  | 7  | 7  | 8  | 8  | 8  |
| High | Q90928 | Histone-binding protein RBBP4 OS=Homo sapiens OX=9606 GN=RBBP4 PE=1 SV=3                                                       | 64 | 9  | 4  | 47.6  | 22 | 425  | 4.89  | 4  | 3  | 6  | 9  | 8  | 8  | 4  | 3  | 5  | 7  | 7  | 7  |
| High | P04424 | Argininosuccinate lyase OS=Homo sapiens OX=9606 GN=ASL PE=1 SV=4                                                               | 64 | 14 | 14 | 51.6  | 35 | 464  | 6.48  | 6  | 6  | 5  | 4  | 5  | 4  | 6  | 5  | 4  | 5  | 4  | 5  |
| High | Q99543 | DnaJ homolog subfamily C member 2 OS=Homo sapiens OX=9606 GN=DNAJC2 PE=1 SV=4                                                  | 63 | 14 | 14 | 72    | 24 | 621  | 8.7   | 4  | 6  | 5  | 5  | 8  | 4  | 6  | 5  | 5  | 5  | 8  | 5  |
| High | P17655 | Calpain-2 catalytic subunit OS=Homo sapiens OX=9606 GN=CAPN2 PE=1 SV=6                                                         | 63 | 14 | 14 | 79.9  | 28 | 700  | 4.98  | 7  | 6  | 4  | 7  | 3  | 6  | 4  | 6  | 4  | 7  | 3  | 6  |
| High | P04080 | Cystatin B OS=Homo sapiens OX=9606 GN=CS1B PE=1 SV=2                                                                           | 63 | 5  | 5  | 11.1  | 77 | 98   | 7.56  | 5  | 7  | 8  | 4  | 8  | 5  | 4  | 5  | 4  | 3  | 4  | 3  |
| High | P62363 | 60S ribosomal protein S14 OS=Homo sapiens OX=9606 GN=RPS14 PE=1 SV=3                                                           | 63 | 6  | 6  | 15.3  | 38 | 151  | 10.05 | 6  | 5  | 7  | 9  | 7  | 8  | 4  | 4  | 5  | 5  | 5  | 5  |
| High | P62993 | Growth factor receptor-bound protein 2 OS=Homo sapiens OX=9606 GN=GRB2 PE=1 SV=1                                               | 63 | 12 | 12 | 25.2  | 61 | 217  | 6.32  | 7  | 6  | 10 | 6  | 6  | 6  | 6  | 6  | 6  | 6  | 6  | 6  |
| High | Q96C19 | EF-hand domain-containing protein D2 OS=Homo sapiens OX=9606 GN=EFHD2 PE=1 SV=1                                                | 63 | 11 | 11 | 26.7  | 38 | 240  | 5.2   | 8  | 10 | 9  | 5  | 4  | 4  | 8  | 9  | 8  | 5  | 4  | 4  |
| High | Q14258 | E3 ubiquitin ligase TRIM25 OS=Homo sapiens OX=9606 GN=TRIM25 PE=1 SV=2                                                         | 63 | 13 | 13 | 70.9  | 29 | 630  | 8.09  | 10 | 12 | 7  | 4  | 4  | 4  | 9  | 11 | 7  | 4  | 3  | 4  |
| High | P09496 | Clathrin light chain A OS=Homo sapiens OX=9606 GN=CLTA PE=1 SV=1                                                               | 63 | 7  | 7  | 27.1  | 20 | 248  | 4.51  | 7  | 7  | 7  | 4  | 6  | 6  | 6  | 6  | 5  | 4  | 6  | 6  |
| High | P11388 | DNA topoisomerase 2-alpha OS=Homo sapiens OX=9606 GN=TOP2A PE=1 SV=3                                                           | 63 | 16 | 8  | 174.3 | 11 | 1531 | 8.72  | 6  | 12 | 12 | 3  | 6  | 3  | 6  | 12 | 10 | 3  | 5  | 3  |
| High | Q04837 | Single-stranded DNA-binding protein, mitochondrial OS=Homo sapiens OX=9606 GN=SSBP1 PE=1 SV=1                                  | 62 | 7  | 7  | 17.2  | 52 | 148  | 9.6   | 10 | 8  | 8  | 6  | 8  | 6  | 7  | 6  | 7  | 5  | 7  | 7  |
| High | Q9NU06 | SPATS2-like protein OS=Homo sapiens OX=9606 GN=SPATS2L PE=1 SV=2                                                               | 62 | 12 | 12 | 61.7  | 28 | 558  | 9.64  | 4  | 4  | 3  | 6  | 9  | 8  | 4  | 4  | 3  | 6  | 8  | 7  |
| High | Q9Y520 | Protein PRRC2 OS=Homo sapiens OX=9606 GN=PRRC2 PE=1 SV=4                                                                       | 62 | 19 | 19 | 316.7 | 8  | 2896 | 9.13  | 1  | 1  | 7  | 9  | 9  | 8  | 1  | 1  | 7  | 9  | 8  | 7  |
| High | Q99873 | Protein arginine N-methyltransferase 1 OS=Homo sapiens OX=9606 GN=PRMT1 PE=1 SV=3                                              | 62 | 10 | 10 | 42    | 33 | 371  | 5.35  | 4  | 4  | 8  | 6  | 6  | 7  | 4  | 4  | 8  | 6  | 6  | 7  |
| High | Q13596 | Sorting nexin-1 OS=Homo sapiens OX=9606 GN=SNX1 PE=1 SV=3                                                                      | 62 | 12 | 10 | 59    | 15 | 523  | 6.15  | 5  | 3  | 6  | 6  | 9  | 10 | 6  | 5  | 3  | 6  | 6  | 6  |
| High | Q96Z76 | Microspherule protein 1 OS=Homo sapiens OX=9606 GN=MCSR1 PE=1 SV=1                                                             | 62 | 15 | 15 | 51.8  | 29 | 462  | 9.38  | 7  | 9  | 9  | 10 | 7  | 8  | 4  | 4  | 5  | 8  | 7  | 7  |
| High | Q9H726 | Histone acetyltransferase KAT8 OS=Homo sapiens OX=9606 GN=KAT8 PE=1 SV=2                                                       | 62 | 13 | 12 | 52.4  | 32 | 458  | 8.27  | 6  | 6  | 12 | 8  | 8  | 6  | 6  | 11 | 7  | 6  | 11 | 7  |
| High | Q13435 | Splicing factor 3B subunit 2 OS=Homo sapiens OX=9606 GN=SF3B2 PE=1 SV=2                                                        | 62 | 16 | 16 | 100.2 | 22 | 895  | 5.67  | 2  | 3  | 2  | 5  | 9  | 5  | 2  | 3  | 2  | 5  | 9  | 5  |
| High | Q99439 | Calponin-2 OS=Homo sapiens OX=9606 GN=CNN2 PE=1 SV=4                                                                           | 62 | 11 | 11 | 33.7  | 54 | 309  | 7.33  | 6  | 5  | 7  | 5  | 6  | 6  | 5  | 5  | 5  | 6  | 6  | 6  |
| High | Q1KMD3 | Heterogeneous nuclear ribonucleoprotein U-like protein 2 OS=Homo sapiens OX=9606 GN=HNRNPUL2 PE=1 SV=1                         | 62 | 13 | 13 | 85.1  | 19 | 747  | 4.91  | 8  | 7  | 9  | 4  | 5  | 5  | 8  | 7  | 9  | 4  | 5  | 5  |
| High | P61081 | NEDD8-conjugating enzyme Ubc12 OS=Homo sapiens OX=9606 GN=UBE2M PE=1 SV=1                                                      | 61 | 7  | 7  | 20.9  | 33 | 183  | 7.69  | 7  | 7  | 9  | 4  | 5  | 5  | 7  | 6  | 7  | 5  | 5  | 7  |
| High | Q710Y3 | tRNA methyltransferase 10 homolog C OS=Homo sapiens OX=9606 GN=TRMT10C PE=1 SV=2                                               | 61 | 16 | 16 | 47.3  | 41 | 403  | 9.36  | 5  | 8  | 5  | 4  | 8  | 3  | 5  | 8  | 5  | 4  | 8  | 3  |
| High | Q8WXF1 | Paraspeckle component 1 OS=Homo sapiens OX=9606 GN=PSPC1 PE=1 SV=1                                                             | 61 | 13 | 13 | 58.7  | 33 | 523  | 6.67  | 1  | 1  | 1  | 9  | 11 | 9  | 1  | 1  | 9  | 11 | 9  | 9  |
| High | Q81EM1 | Nuclear pore membrane glycoprotein 210 OS=Homo sapiens OX=9606 GN=NUP210 PE=1 SV=3                                             | 61 | 18 | 18 | 205   | 12 | 1887 | 6.81  | 3  | 2  | 4  | 3  | 2  | 7  | 3  | 2  | 4  | 3  | 6  | 7  |
| High | Q02218 | 2-oxoglutarate-dependent methyltransferase OS=Homo sapiens OX=9606 GN=ODM1 PE=1 SV=3                                           | 61 | 18 | 18 | 155.9 | 21 | 1023 | 6.36  | 5  | 5  | 5  | 3  | 2  | 4  | 3  | 2  | 3  | 2  | 3  | 2  |
| High | P23688 | Splicing factor U2AF 65 kDa subunit OS=Homo sapiens OX=9606 GN=U2AF2 PE=1 SV=4                                                 | 61 | 8  | 8  | 53.5  | 29 | 475  | 6.09  | 6  | 4  | 5  | 6  | 6  | 7  | 6  | 4  | 5  | 5  | 5  | 5  |
| High | Q14103 | Heterogeneous nuclear ribonucleoprotein D0 OS=Homo sapiens OX=9606 GN=HNRND0 PE=1 SV=1                                         | 61 | 8  | 6  | 38.4  | 24 | 355  | 7.81  | 8  | 8  | 9  | 4  | 5  | 3  | 7  | 7  | 7  | 3  | 4  | 2  |
| High | Q98H55 | Halocatal dehalogenase-like hydrolase domain-containing protein 3 OS=Homo sapiens OX=9606 GN=HDH3 PE=1 SV=1                    | 61 | 8  | 8  | 28    | 45 | 251  | 6.71  | 8  | 8  | 9  | 4  | 3  | 4  | 6  | 6  | 7  | 4  | 3  | 4  |
| High | P38919 | Eukaryotic initiation factor 4A-III OS=Homo sapiens OX=9606 GN=EIF4A3 PE=1 SV=4                                                | 61 | 13 | 11 | 46.8  | 31 | 411  | 6.73  | 8  | 9  | 5  | 8  | 8  | 7  | 8  | 9  | 5  | 5  | 8  | 7  |
| High | Q01167 | Forkhead box protein K2 OS=Homo sapiens OX=9606 GN=FOXK2 PE=1 SV=3                                                             | 61 | 13 | 11 | 69    | 27 | 660  | 9.54  | 6  | 5  | 7  | 6  | 8  | 12 | 8  | 4  | 8  | 11 | 8  | 7  |
| High | Q9UBU9 | Nuclear RNA export factor 1 OS=Homo sapiens OX=9606 GN=NXF1 PE=1 SV=1                                                          | 60 | 23 | 23 | 70.1  | 44 | 619  | 8.51  | 5  | 4  | 5  | 7  | 6  | 6  | 5  | 4  | 5  | 6  | 5  | 6  |
| High | Q16576 | Histone-binding protein RBBP7 OS=Homo sapiens OX=9606 GN=RBBP7 PE=1 SV=1                                                       | 60 | 1  |    |       |    |      |       |    |    |    |    |    |    |    |    |    |    |    |    |







|      |         |                                                                                                                                          |    |    |    |       |    |      |       |   |   |   |   |    |   |   |   |   |   |   |   |
|------|---------|------------------------------------------------------------------------------------------------------------------------------------------|----|----|----|-------|----|------|-------|---|---|---|---|----|---|---|---|---|---|---|---|
| High | P50851  | Lipopolysaccharide-responsive and beige-like anchor protein OS=Homo sapiens OX=9606 GN=LRAA PE=1 SV=4                                    | 26 | 12 | 12 | 318.9 | 5  | 2863 | 5.6   | 2 | 2 | 7 | 1 |    | 1 | 2 | 2 | 7 | 1 |   | 1 |
| High | P16455  | Methylated-DNA-protein-cysteine methyltransferase OS=Homo sapiens OX=9606 GN=MGMT PE=1 SV=1                                              | 26 | 6  | 6  | 21.6  | 33 | 207  | 8.1   | 3 | 3 | 2 | 2 | 3  | 2 | 3 | 3 | 2 | 2 | 3 | 2 |
| High | Q92552  | 28S ribosomal protein S27, mitochondrial OS=Homo sapiens OX=9606 GN=MRPS27 PE=1 SV=3                                                     | 26 | 9  | 9  | 47.6  | 25 | 414  | 6.18  | 2 | 3 | 1 | 2 | 2  | 3 | 2 | 3 | 1 | 2 | 2 | 3 |
| High | Q9BRK5  | 45 kDa calcium-binding protein OS=Homo sapiens OX=9606 GN=SDFA PE=1 SV=1                                                                 | 26 | 6  | 6  | 41.8  | 20 | 362  | 4.86  | 5 | 5 | 6 | 2 | 1  | 2 | 4 | 4 | 6 | 2 | 1 | 2 |
| High | Q96584  | SRSF protein kinase 1 OS=Homo sapiens OX=9606 GN=SRPK1 PE=1 SV=2                                                                         | 26 | 9  | 7  | 74.3  | 17 | 655  | 6.16  | 2 | 2 | 2 | 2 | 4  | 3 | 2 | 2 | 2 | 2 | 4 | 3 |
| High | P62857  | 40S ribosomal protein S28 OS=Homo sapiens OX=9606 GN=RPS28 PE=1 SV=1                                                                     | 26 | 2  | 2  | 7.8   | 30 | 69   | 10.7  | 3 | 2 | 3 | 2 | 3  | 3 | 2 | 2 | 2 | 2 | 1 | 2 |
| High | Q00410  | Importin-5 OS=Homo sapiens OX=9606 GN=IPO5 PE=1 SV=4                                                                                     | 26 | 7  | 7  | 123.6 | 9  | 1097 | 4.94  | 3 | 2 | 2 | 1 | 2  | 3 | 2 | 2 | 2 | 1 | 2 | 2 |
| High | Q9N1Y2  | H/ACA ribonucleoprotein complex subunit 1 OS=Homo sapiens OX=9606 GN=GAR1 PE=1 SV=1                                                      | 25 | 4  | 4  | 22.3  | 25 | 217  | 10.92 | 3 | 3 | 4 | 2 | 1  | 1 | 3 | 3 | 4 | 2 | 1 | 1 |
| High | P43204  | Glycerol-3-phosphate dehydrogenase, mitochondrial OS=Homo sapiens OX=9606 GN=GDH2 PE=1 SV=3                                              | 25 | 10 | 10 | 82.4  | 17 | 770  | 7.53  | 2 | 2 | 2 | 2 | 2  | 4 | 2 | 2 | 2 | 2 | 2 | 4 |
| High | Q9UKV3  | Apoptotic chromatin condensation inducer in the nucleus OS=Homo sapiens OX=9606 GN=ACIN1 PE=1 SV=2                                       | 25 | 8  | 8  | 151.8 | 8  | 1341 | 6.43  | 2 | 1 | 2 | 2 | 1  | 2 | 2 | 1 | 2 | 1 | 2 | 2 |
| High | P63165  | Small ubiquitin-related modifier 1 OS=Homo sapiens OX=9606 GN=SUMO1 PE=1 SV=1                                                            | 25 | 3  | 3  | 11.6  | 28 | 101  | 5.52  | 1 | 1 | 2 | 1 | 2  | 1 | 2 | 1 | 1 | 2 | 1 | 1 |
| High | Q060784 | Target of Myb protein 1 OS=Homo sapiens OX=9606 GN=TOM1 PE=1 SV=2                                                                        | 25 | 7  | 7  | 53.8  | 25 | 492  | 4.7   | 3 | 3 | 3 | 1 | 2  | 3 | 3 | 3 | 3 | 1 | 2 | 1 |
| High | Q14244  | Enscosin OS=Homo sapiens OX=9606 GN=MAP7 PE=1 SV=1                                                                                       | 25 | 5  | 5  | 84    | 7  | 749  | 9.61  | 2 | 3 | 3 | 2 | 3  | 2 | 2 | 2 | 3 | 2 | 3 | 2 |
| High | O15145  | Actin-related protein 2/3 complex subunit 3 OS=Homo sapiens OX=9606 GN=ARPC3 PE=1 SV=3                                                   | 25 | 4  | 4  | 20.5  | 21 | 178  | 8.59  | 4 | 3 | 3 | 1 | 2  | 1 | 4 | 3 | 3 | 1 | 2 | 1 |
| High | Q9Y5M8  | Signal recognition particle receptor subunit beta OS=Homo sapiens OX=9606 GN=SRPRB PE=1 SV=3                                             | 25 | 6  | 6  | 29.7  | 27 | 271  | 9.04  | 3 | 2 | 4 | 2 | 2  | 2 | 3 | 2 | 4 | 2 | 2 | 2 |
| High | P62070  | Ras-related protein R-Ras OS=Homo sapiens OX=9606 GN=RRAS2 PE=1 SV=1                                                                     | 25 | 5  | 5  | 23.4  | 31 | 204  | 6.01  | 3 | 4 | 3 | 1 | 1  | 1 | 3 | 2 | 1 | 1 | 1 | 1 |
| High | P08559  | Pyruvate dehydrogenase E1 component subunit alpha, somatic form, mitochondrial OS=Homo sapiens OX=9606 GN=PDHA1 PE=1 SV=1                | 25 | 9  | 9  | 43.3  | 22 | 390  | 8.06  | 1 | 2 | 3 | 1 | 1  | 1 | 1 | 1 | 2 | 3 | 1 | 1 |
| High | Q9NR19  | Acetyl-coenzyme A synthetase, cytoplasmic OS=Homo sapiens OX=9606 GN=ACSS2 PE=1 SV=1                                                     | 25 | 5  | 5  | 78.5  | 6  | 701  | 6.46  | 3 | 3 | 4 | 2 | 2  | 1 | 3 | 3 | 4 | 2 | 2 | 1 |
| High | Q95471  | Prefoldin subunit 5 OS=Homo sapiens OX=9606 GN=PFDF5 PE=1 SV=2                                                                           | 25 | 5  | 5  | 17.3  | 38 | 154  | 6.33  | 2 | 2 | 2 | 2 | 2  | 2 | 2 | 2 | 2 | 2 | 2 | 2 |
| High | Q92925  | SWI/SNF-related matrix-associated actin-dependent regulator of chromatin subfamily D member 2 OS=Homo sapiens OX=9606 GN=SMAD2 PE=1 SV=3 | 25 | 8  | 7  | 58.9  | 19 | 531  | 9.64  | 1 | 1 | 1 | 2 | 2  | 1 | 1 | 1 | 1 | 2 | 2 | 1 |
| High | O95299  | NADH dehydrogenase [ubiquinone] 1 alpha subcomplex subunit 10, mitochondrial OS=Homo sapiens OX=9606 GN=NDUFA10 PE=1 SV=1                | 25 | 4  | 4  | 40.7  | 11 | 355  | 8.48  | 2 | 3 | 3 | 2 | 2  | 2 | 2 | 2 | 2 | 2 | 2 | 3 |
| High | O95663  | TIP41-like protein OS=Homo sapiens OX=9606 GN=TIPRL PE=1 SV=2                                                                            | 25 | 7  | 7  | 31.4  | 38 | 272  | 5.91  | 4 | 3 | 3 | 1 | 2  | 4 | 3 | 3 | 1 | 2 | 2 | 3 |
| High | Q05193  | Dynamitin-1 OS=Homo sapiens OX=9606 GN=DNM1 PE=1 SV=2                                                                                    | 25 | 6  | 1  | 97.3  | 7  | 864  | 7.17  | 4 | 3 | 5 | 2 | 3  | 3 | 5 | 2 | 3 | 5 | 2 | 2 |
| High | P60953  | Cell division control protein 42 homolog OS=Homo sapiens OX=9606 GN=CDC42 PE=1 SV=2                                                      | 25 | 4  | 3  | 21.2  | 26 | 191  | 6.55  | 3 | 5 | 2 | 2 | 2  | 2 | 3 | 4 | 2 | 2 | 2 | 2 |
| High | O00193  | Small acidic protein OS=Homo sapiens OX=9606 GN=SMAP PE=1 SV=1                                                                           | 25 | 4  | 4  | 20.3  | 22 | 183  | 4.72  | 1 | 1 | 3 | 2 | 4  | 3 | 1 | 1 | 3 | 2 | 4 | 2 |
| High | O94776  | Metastasis-associated protein MTA2 OS=Homo sapiens OX=9606 GN=MTA2 PE=1 SV=1                                                             | 25 | 8  | 7  | 75    | 14 | 668  | 9.66  | 1 | 2 | 4 | 2 | 3  | 1 | 1 | 2 | 3 | 2 | 3 | 1 |
| High | Q8TD30  | Alanine aminotransferase 2 OS=Homo sapiens OX=9606 GN=GFPT2 PE=1 SV=1                                                                    | 25 | 8  | 8  | 57.9  | 25 | 523  | 7.71  | 1 | 4 | 4 | 2 | 2  | 1 | 1 | 4 | 4 | 2 | 3 | 1 |
| High | Q93052  | Lipoma-preferred partner OS=Homo sapiens OX=9606 GN=LPP PE=1 SV=1                                                                        | 25 | 6  | 6  | 65.7  | 17 | 612  | 7.37  | 2 | 2 | 2 | 3 | 3  | 2 | 2 | 2 | 2 | 3 | 3 | 2 |
| High | Q96J02  | AMS1H-like protease OS=Homo sapiens OX=9606 GN=STAMBPL1 PE=1 SV=2                                                                        | 25 | 6  | 6  | 49.8  | 20 | 436  | 7.23  | 3 | 3 | 4 | 1 | 1  | 1 | 3 | 3 | 4 | 1 | 1 | 1 |
| High | P98082  | Disabled homolog 2 OS=Homo sapiens OX=9606 GN=DIS2 PE=1 SV=3                                                                             | 25 | 7  | 7  | 82.4  | 17 | 770  | 5.53  | 2 | 2 | 4 | 2 | 2  | 2 | 2 | 2 | 2 | 2 | 2 | 4 |
| High | O00469  | Procollagen-lysine-2-oxoglutarate 5-dioxygenase 2 OS=Homo sapiens OX=9606 GN=PLOD2 PE=1 SV=2                                             | 25 | 10 | 10 | 84.6  | 16 | 737  | 6.71  | 2 | 2 | 3 | 2 | 2  | 2 | 2 | 2 | 2 | 3 | 2 | 2 |
| High | Q14498  | RNA-binding protein 39 OS=Homo sapiens OX=9606 GN=RBM39 PE=1 SV=2                                                                        | 25 | 5  | 5  | 59.3  | 12 | 530  | 10.1  | 2 | 2 | 2 | 2 | 2  | 2 | 2 | 2 | 2 | 2 | 2 | 2 |
| High | P31948  | Stress-induced-phosphoprotein 1 OS=Homo sapiens OX=9606 GN=STIP1 PE=1 SV=1                                                               | 25 | 7  | 7  | 62.6  | 16 | 543  | 6.8   | 4 | 3 | 5 | 1 | 2  | 1 | 4 | 3 | 5 | 1 | 2 | 1 |
| High | Q92506  | (3R)-3-hydroxyacyl-CoA dehydrogenase OS=Homo sapiens OX=9606 GN=HSD17B8 PE=1 SV=2                                                        | 25 | 5  | 5  | 27    | 25 | 261  | 6.54  | 1 | 1 | 1 | 3 | 3  | 3 | 1 | 1 | 3 | 3 | 3 | 3 |
| High | P09211  | Glutathione S-transferase P OS=Homo sapiens OX=9606 GN=GSTP1 PE=1 SV=2                                                                   | 25 | 5  | 5  | 23.3  | 36 | 210  | 5.64  | 3 | 3 | 3 | 1 | 2  | 1 | 3 | 3 | 3 | 1 | 2 | 1 |
| High | O75436  | Vacuolar protein sorting-associated protein 26A OS=Homo sapiens OX=9606 GN=VPS26A PE=1 SV=2                                              | 25 | 5  | 4  | 38.1  | 22 | 327  | 6.57  | 2 | 3 | 3 | 3 | 4  | 2 | 2 | 3 | 3 | 3 | 4 | 2 |
| High | Q9NQ78  | Kinesin-like protein KIF138 OS=Homo sapiens OX=9606 GN=KIF13B PE=1 SV=2                                                                  | 25 | 7  | 6  | 202.7 | 5  | 1826 | 5.88  | 4 | 4 | 2 | 4 | 4  | 2 | 4 | 4 | 2 | 4 | 2 | 2 |
| High | Q16543  | Hsp90 co-chaperone Cdc37 OS=Homo sapiens OX=9606 GN=CDC37 PE=1 SV=1                                                                      | 25 | 7  | 7  | 44.4  | 21 | 378  | 5.25  | 2 | 2 | 5 | 4 | 2  | 2 | 2 | 2 | 2 | 5 | 4 | 2 |
| High | Q9Y6R7  | IGFC-binding protein OS=Homo sapiens OX=9606 GN=IGFBP PE=1 SV=3                                                                          | 25 | 11 | 11 | 571.6 | 6  | 5405 | 5.34  | 1 | 2 | 3 | 2 | 2  | 2 | 1 | 2 | 2 | 2 | 2 | 2 |
| High | Q9Y5A9  | YTH domain-containing family protein 2 OS=Homo sapiens OX=9606 GN=YTHDF2 PE=1 SV=2                                                       | 25 | 9  | 9  | 62.3  | 7  | 579  | 8.79  | 3 | 3 | 3 | 3 | 3  | 2 | 3 | 3 | 3 | 3 | 3 | 2 |
| High | Q9UHD2  | Serine/threonine-protein kinase TBK1 OS=Homo sapiens OX=9606 GN=TBK1 PE=1 SV=1                                                           | 25 | 4  | 9  | 83.6  | 14 | 729  | 7.9   | 1 | 2 | 1 | 2 | 2  | 1 | 2 | 1 | 2 | 1 | 2 | 2 |
| High | Q8TCT9  | Minor histocompatibility antigen H13 OS=Homo sapiens OX=9606 GN=HM13 PE=1 SV=1                                                           | 25 | 5  | 5  | 41.5  | 16 | 377  | 6.43  | 2 | 3 | 3 | 1 | 2  | 3 | 3 | 3 | 3 | 3 | 3 | 1 |
| High | O75643  | U5 small nuclear ribonucleoprotein 200 kDa helicase OS=Homo sapiens OX=9606 GN=SNRNP200 PE=1 SV=2                                        | 25 | 15 | 15 | 244.4 | 10 | 2136 | 6.06  | 3 | 2 | 1 | 3 | 3  | 2 | 3 | 2 | 1 | 3 | 3 | 1 |
| High | Q92905  | COP9 signalosome complex subunit 5 OS=Homo sapiens OX=9606 GN=COP5 PE=1 SV=4                                                             | 25 | 6  | 6  | 37.6  | 23 | 334  | 6.54  | 2 | 2 | 4 | 3 | 2  | 2 | 2 | 2 | 4 | 2 | 4 | 3 |
| High | P08758  | Annexin A5 OS=Homo sapiens OX=9606 GN=ANXA5 PE=1 SV=2                                                                                    | 25 | 8  | 8  | 35.9  | 26 | 320  | 5.05  | 3 | 2 | 3 | 4 | 5  | 4 | 3 | 2 | 4 | 3 | 2 | 5 |
| High | Q9NZ01  | Very-long-chain enoyl-CoA reductase OS=Homo sapiens OX=9606 GN=TECR PE=1 SV=1                                                            | 25 | 8  | 8  | 36    | 25 | 308  | 9.45  | 5 | 6 | 3 | 1 | 5  | 5 | 3 | 3 | 3 | 3 | 3 | 4 |
| High | Q9H7C9  | Mth938 domain-containing protein OS=Homo sapiens OX=9606 GN=AAMDC PE=1 SV=1                                                              | 25 | 5  | 5  | 13.3  | 43 | 122  | 8.46  | 2 | 3 | 3 | 3 | 4  | 2 | 5 | 3 | 3 | 3 | 3 | 1 |
| High | Q9P035  | Very-long-chain (3R)-3-hydroxyacyl-CoA dehydratase 3 OS=Homo sapiens OX=9606 GN=HACD3 PE=1 SV=2                                          | 24 | 5  | 5  | 43.1  | 14 | 362  | 8.94  | 5 | 4 | 2 | 1 | 2  | 2 | 5 | 4 | 2 | 1 | 2 | 2 |
| High | P28331  | NADH-ubiquinone oxidoreductase 75 kDa subunit, mitochondrial OS=Homo sapiens OX=9606 GN=NDUFS1 PE=1 SV=3                                 | 24 | 11 | 11 | 79.4  | 19 | 727  | 6.23  | 1 | 2 | 3 | 1 | 2  | 1 | 2 | 2 | 3 | 1 | 2 | 2 |
| High | A3KMH1  | von Willebrand factor A domain-containing protein 8 OS=Homo sapiens OX=9606 GN=VWF8 PE=1 SV=2                                            | 24 | 7  | 7  | 24.7  | 4  | 1905 | 7.4   | 7 | 6 | 2 | 1 | 7  | 6 | 3 | 7 | 6 | 3 | 7 | 3 |
| High | P11908  | Ribose-phosphate pyrophosphokinase 2 OS=Homo sapiens OX=9606 GN=PPRS2 PE=1 SV=2                                                          | 24 | 5  | 1  | 34.7  | 20 | 318  | 6.61  | 3 | 3 | 3 | 1 | 1  | 3 | 3 | 3 | 3 | 1 | 3 | 3 |
| High | Q9UBV8  | Peflin OS=Homo sapiens OX=9606 GN=PEF1 PE=1 SV=1                                                                                         | 24 | 4  | 4  | 30.4  | 13 | 284  | 6.54  | 3 | 3 | 3 | 3 | 2  | 1 | 3 | 3 | 3 | 3 | 2 | 1 |
| High | Q9H2P0  | Activity-dependent neuroprotector homeobox protein OS=Homo sapiens OX=9606 GN=ADNP PE=1 SV=1                                             | 24 | 7  | 7  | 123.5 | 8  | 1102 | 7.34  | 3 | 2 | 3 | 2 | 2  | 3 | 3 | 2 | 3 | 2 | 2 | 3 |
| High | Q8Y1S1  | Xaa-Arg dipeptidase OS=Homo sapiens OX=9606 GN=PM2D2 PE=1 SV=2                                                                           | 24 | 3  | 3  | 47.7  | 11 | 436  | 5.85  | 2 | 3 | 2 | 2 | 2  | 2 | 3 | 2 | 2 | 2 | 2 | 2 |
| High | P62837  | Ubiquitin-conjugating enzyme E2 D2 OS=Homo sapiens OX=9606 GN=UBE2D2 PE=1 SV=1                                                           | 24 | 4  | 3  | 16.7  | 41 | 147  | 7.83  | 2 | 4 | 4 | 1 | 3  | 2 | 2 | 4 | 3 | 1 | 2 | 2 |
| High | P40429  | 60S ribosomal protein L13a OS=Homo sapiens OX=9606 GN=RPL13A PE=1 SV=2                                                                   | 24 | 4  | 4  | 23.6  | 21 | 203  | 10.93 | 2 | 1 | 2 | 2 | 2  | 2 | 2 | 1 | 1 | 2 | 2 | 2 |
| High | O14980  | Exportin-1 OS=Homo sapiens OX=9606 GN=XPO1 PE=1 SV=1                                                                                     | 24 | 9  | 9  | 123.3 | 9  | 1071 | 6.06  | 3 | 4 | 2 | 2 | 2  | 2 | 4 | 2 | 2 | 4 | 2 | 2 |
| High | P12882  | Myosin-1 OS=Homo sapiens OX=9606 GN=MYH1 PE=1 SV=3                                                                                       | 24 | 4  | 4  | 223   | 6  | 1939 | 5.74  | 2 | 2 | 4 | 3 | 6  | 3 | 2 | 1 | 2 | 3 | 6 | 3 |
| High | P62266  | 40S ribosomal protein S23 OS=Homo sapiens OX=9606 GN=RPS23 PE=1 SV=3                                                                     | 24 | 3  | 3  | 15.8  | 21 | 143  | 10.49 | 2 | 2 | 3 | 2 | 2  | 3 | 2 | 2 | 2 | 2 | 2 | 2 |
| High | P02452  | Calmodulin-binding protein OS=Homo sapiens OX=9606 GN=CBP PE=1 SV=6                                                                      | 24 | 5  | 5  | 138.8 | 25 | 1227 | 5.82  | 4 | 4 | 6 | 5 | 14 | 5 | 4 | 4 | 6 | 4 | 4 | 3 |
| High | O7L2E3  | ATP-dependent RNA helicase DHX30 OS=Homo sapiens OX=9606 GN=DXH30 PE=1 SV=1                                                              | 24 | 8  | 8  | 133.9 | 9  | 1194 | 8.78  | 1 | 1 | 1 | 1 | 1  | 1 | 1 | 1 | 1 | 1 | 2 | 2 |
| High | Q9Y3A5  | Ribosome maturation protein SBDS OS=Homo sapiens OX=9606 GN=SBDS PE=1 SV=4                                                               | 24 | 6  | 6  | 28.7  | 24 | 250  | 8.75  | 4 | 3 | 3 | 1 | 1  | 1 | 4 | 3 | 3 | 1 | 1 | 1 |
| High | Q96HE7  | ERO1-like protein alpha OS=Homo sapiens OX=9606 GN=ERO1A PE=1 SV=2                                                                       | 24 | 9  | 9  | 54.4  | 27 | 468  | 5.68  | 2 | 3 | 2 | 2 | 1  | 1 | 2 | 2 | 2 | 2 | 1 | 1 |
| High | P02584  | SWISS-PROT-P02584 (Bos taurus) Profilin-1                                                                                                | 24 | 4  | 1  | 15    | 31 | 140  | 8.28  | 3 | 3 | 3 | 3 | 2  | 2 | 3 | 3 | 3 | 3 | 2 | 2 |
| High | Q99700  | Ataxin-2 OS=Homo sapiens OX=9606 GN=ATXN2 PE=1 SV=2                                                                                      | 24 | 5  | 5  | 140.2 | 5  | 1313 | 9.57  | 1 | 1 | 1 | 4 | 2  | 4 | 1 | 1 | 4 | 2 | 4 | 2 |
| High | Q02978  | Mitochondrial 2-oxoglutarate/malate carrier protein OS=Homo sapiens OX=9606 GN=SLC25A11 PE=1 SV=3                                        | 24 | 7  | 7  | 34    | 23 | 314  | 9.91  | 5 | 4 | 7 | 5 | 4  | 7 | 5 | 4 | 7 | 5 | 4 | 7 |
| High | Q15382  | GTP-binding protein Rheb OS=Homo sapiens OX=9606 GN=RHEB PE=1 SV=1                                                                       | 24 | 5  | 5  | 20.5  | 28 | 184  | 5.92  | 2 | 3 | 2 | 1 | 2  | 1 | 2 | 3 | 2 | 1 | 2 | 1 |
| High | Q9HC78  | Zinc finger and BTB domain-containing protein 20 OS=Homo sapiens OX=9                                                                    |    |    |    |       |    |      |       |   |   |   |   |    |   |   |   |   |   |   |   |





|      |        |                                                                               |                                               |    |    |    |       |    |      |       |   |   |   |   |   |   |   |   |   |   |   |   |   |
|------|--------|-------------------------------------------------------------------------------|-----------------------------------------------|----|----|----|-------|----|------|-------|---|---|---|---|---|---|---|---|---|---|---|---|---|
| High | P08579 | U2 small nuclear ribonucleoprotein B'                                         | OS=Homo sapiens OX=9066 GN=SNRPB2 PE=1 SV=1   | 17 | 3  | 1  | 25.5  | 12 | 225  | 9.72  | 2 | 1 | 1 | 1 | 3 | 2 | 2 | 1 | 1 | 1 | 2 | 2 |   |
| High | P46379 | Large proline-rich protein BAG6                                               | OS=Homo sapiens OX=9066 GN=BAG6 PE=1 SV=2     | 17 | 5  | 5  | 119.3 | 7  | 1132 | 5.6   | 2 | 2 | 3 | 2 | 4 |   |   |   |   |   | 3 | 2 | 4 |
| High | Q13243 | Serine/arginine-rich splicing factor 5                                        | OS=Homo sapiens OX=9066 GN=SRSF5 PE=1 SV=1    | 17 | 5  | 4  | 31.2  | 25 | 272  | 11.59 | 2 | 2 | 1 | 2 | 2 | 2 | 2 | 1 | 2 |   | 3 | 2 | 4 |
| High | O00330 | Pyruvate dehydrogenase X component, mitochondrial                             | OS=Homo sapiens OX=9066 GN=PDHX PE=1 SV=3     | 16 | 5  | 5  | 54.1  | 12 | 501  | 8.66  |   | 1 | 1 | 1 | 2 |   |   | 1 | 1 |   | 1 | 1 | 1 |
| High | Q14651 | Plastin-1                                                                     | OS=Homo sapiens OX=9066 GN=PLS1 PE=1 SV=2     | 16 | 5  | 1  | 70.2  | 11 | 629  | 5.41  | 2 | 2 | 2 | 1 | 2 | 2 | 2 | 2 | 2 | 2 | 1 | 2 | 2 |
| High | Q96573 | Paired amphipathic helix protein Sin3a                                        | OS=Homo sapiens OX=9066 GN=SN3A PE=1 SV=2     | 16 | 8  | 6  | 145.1 | 6  | 1273 | 7.25  |   |   |   | 1 | 3 | 1 |   |   |   |   | 1 | 3 | 1 |
| High | Q9NXH8 | Torsin-4A                                                                     | OS=Homo sapiens OX=9066 GN=TORAA PE=1 SV=2    | 16 | 6  | 6  | 46.9  | 15 | 423  | 9.94  | 1 | 2 | 2 | 1 | 2 | 1 | 1 | 1 | 4 |   | 2 | 1 | 1 |
| High | Q98P55 | Actin-related protein 2/3 complex subunit 5-like protein                      | OS=Homo sapiens OX=9066 GN=ARPC5L PE=1 SV=1   | 16 | 4  | 3  | 16.9  | 34 | 153  | 6.6   | 2 | 2 | 1 | 2 | 2 | 1 | 2 | 2 | 1 | 2 | 1 | 1 | 1 |
| High | Q5P7E7 | Nuclear modulator binding protein 1                                           | OS=Homo sapiens OX=9066 GN=NM2 PE=1 SV=1      | 16 | 4  | 3  | 23.7  | 20 | 191  | 4.78  | 2 | 2 | 2 | 1 | 2 | 2 | 1 | 3 | 3 | 2 | 2 | 1 | 1 |
| High | Q06330 | Recombining binding protein suppressor of hairless                            | OS=Homo sapiens OX=9066 GN=RSF1 PE=1 SV=3     | 16 | 5  | 5  | 55.6  | 12 | 500  | 7.18  |   |   |   | 2 | 3 | 3 | 3 |   |   |   | 2 | 3 | 3 |
| High | Q96GM8 | Target of EGR1 protein 1                                                      | OS=Homo sapiens OX=9066 GN=TOE1 PE=1 SV=1     | 16 | 4  | 4  | 56.5  | 13 | 510  | 7.18  | 2 | 1 | 2 | 1 | 1 | 1 | 2 | 1 | 2 | 1 | 1 | 1 | 1 |
| High | Q92922 | SWI/SNF complex subunit SMARCC1                                               | OS=Homo sapiens OX=9066 GN=SMARCC1 PE=1 SV=3  | 16 | 5  | 3  | 122.8 | 7  | 1105 | 5.76  | 1 | 1 | 2 | 1 | 1 | 1 | 1 | 1 | 1 | 1 | 1 | 1 | 1 |
| High | P09525 | Annexin A4                                                                    | OS=Homo sapiens OX=9066 GN=ANXA4 PE=1 SV=4    | 16 | 5  | 5  | 35.9  | 16 | 319  | 6.13  | 2 | 2 | 1 | 1 | 1 | 2 | 2 | 2 | 2 | 1 | 1 | 1 | 2 |
| High | P10620 | Microsomal glutathione S-transferase 1                                        | OS=Homo sapiens OX=9066 GN=MGST1 PE=1 SV=1    | 16 | 3  | 3  | 17.6  | 26 | 155  | 9.39  | 3 | 3 | 3 | 3 | 1 | 3 | 3 | 3 | 3 | 3 | 1 | 1 | 2 |
| High | Q96P55 | DAZ-associated protein 1                                                      | OS=Homo sapiens OX=9066 GN=DAZAP1 PE=1 SV=1   | 16 | 3  | 3  | 43.4  | 10 | 407  | 8.56  | 2 | 2 | 2 | 1 | 2 | 1 | 2 | 2 | 2 | 2 | 1 | 2 | 1 |
| High | P09234 | U1 small nuclear ribonucleoprotein C                                          | OS=Homo sapiens OX=9066 GN=SNRPC PE=1 SV=1    | 16 | 2  | 2  | 17.4  | 19 | 159  | 9.67  | 1 | 2 | 2 | 2 | 2 | 2 | 2 | 2 | 2 | 2 | 2 | 2 | 2 |
| High | A8CG34 | Nuclear envelope pore membrane protein POM121C                                | OS=Homo sapiens OX=9066 GN=POM121C PE=1 SV=3  | 16 | 5  | 5  | 125   | 6  | 1229 | 10.37 |   |   |   | 1 | 1 | 1 | 1 | 1 | 1 | 1 | 1 | 1 | 1 |
| High | Q96P47 | Arf-GAP with GTPase, ANK repeat and PH domain-containing protein 3            | OS=Homo sapiens OX=9066 GN=AGAP3 PE=1 SV=2    | 16 | 3  | 3  | 95    | 5  | 875  | 7.97  | 2 | 3 | 3 | 1 | 1 | 1 | 1 | 2 | 3 | 2 | 1 | 1 | 1 |
| High | Q00182 | Galactin-9                                                                    | OS=Homo sapiens OX=9066 GN=LGALS9 PE=1 SV=2   | 16 | 5  | 2  | 39.5  | 15 | 355  | 9.17  | 1 | 1 | 1 | 2 | 3 | 2 | 1 | 1 | 1 | 1 | 2 | 3 | 2 |
| High | Q92C23 | WD repeat-containing protein 61                                               | OS=Homo sapiens OX=9066 GN=WDR61 PE=1 SV=1    | 16 | 4  | 4  | 33.6  | 14 | 305  | 5.47  | 1 | 1 | 2 | 3 |   |   |   |   |   |   | 2 | 3 | 2 |
| High | Q96A65 | Exocyst complex component 4                                                   | OS=Homo sapiens OX=9066 GN=EXOC4 PE=1 SV=1    | 16 | 8  | 8  | 110.4 | 11 | 974  | 6.49  | 5 | 4 | 5 | 5 | 4 | 5 | 5 | 4 | 5 | 4 | 5 | 4 | 5 |
| High | Q60925 | Prefoldin subunit 1                                                           | OS=Homo sapiens OX=9066 GN=PFDN1 PE=1 SV=2    | 16 | 3  | 3  | 14.2  | 21 | 122  | 6.81  | 2 | 1 | 1 | 3 | 1 | 3 | 1 | 1 | 3 | 1 | 1 | 3 | 1 |
| High | Q6P996 | Pyridoxal-dependent decarboxylase domain-containing protein 1                 | OS=Homo sapiens OX=9066 GN=PDXDC1 PE=1 SV=2   | 16 | 7  | 7  | 86.7  | 12 | 788  | 5.38  | 2 | 1 | 3 | 1 | 3 | 2 | 1 | 1 | 3 | 1 | 3 | 1 | 3 |
| High | Q96DN6 | Methyl-CpG-binding domain protein 6                                           | OS=Homo sapiens OX=9066 GN=MBDG PE=1 SV=2     | 16 | 6  | 6  | 101.1 | 10 | 1003 | 9.63  |   |   |   | 3 | 2 | 2 |   |   |   |   | 3 | 2 | 2 |
| High | Q13404 | Ubiquitin-conjugating enzyme E2 variant 1                                     | OS=Homo sapiens OX=9066 GN=UBE2V1 PE=1 SV=2   | 16 | 3  | 3  | 16.5  | 18 | 147  | 7.93  | 1 | 1 | 1 | 2 | 3 | 2 | 1 | 1 | 1 | 1 | 2 | 3 | 2 |
| High | P12277 | Creatine kinase B-type                                                        | OS=Homo sapiens OX=9066 GN=CKB PE=1 SV=1      | 16 | 4  | 4  | 42.6  | 20 | 381  | 5.59  | 2 | 3 | 1 | 2 | 3 | 1 | 2 | 3 | 1 | 2 | 3 | 1 | 2 |
| High | P27361 | Mitogen-activated protein kinase 3                                            | OS=Homo sapiens OX=9066 GN=MAP3K3 PE=1 SV=4   | 16 | 4  | 1  | 43.1  | 15 | 379  | 6.74  | 2 | 2 | 1 | 1 | 1 | 2 | 2 | 3 | 1 | 2 | 1 | 1 | 2 |
| High | Q60762 | Dolichol-phosphate mannosyltransferase subunit 1                              | OS=Homo sapiens OX=9066 GN=DPM1 PE=1 SV=1     | 16 | 6  | 6  | 29.6  | 28 | 260  | 9.57  | 3 | 2 | 5 |   |   |   |   |   |   |   | 4 | 2 | 5 |
| High | Q965C9 | Cytochrome P450 25L1                                                          | OS=Homo sapiens OX=9066 GN=CYP25L1 PE=1 SV=2  | 16 | 4  | 4  | 55.8  | 8  | 504  | 8.62  | 4 | 4 | 3 |   |   |   |   |   |   |   | 3 | 2 | 3 |
| High | Q95828 | Nuclear modulator binding protein 1                                           | OS=Homo sapiens OX=9066 GN=NM2 PE=1 SV=1      | 16 | 4  | 4  | 49.9  | 19 | 381  | 5.66  | 1 | 1 | 1 | 1 | 1 | 1 | 1 | 1 | 1 | 1 | 1 | 1 | 1 |
| High | Q9N279 | Diphosphoinositol polyphosphate phosphohydrolase 2                            | OS=Homo sapiens OX=9066 GN=NUDT4 PE=1 SV=2    | 16 | 4  | 4  | 20.3  | 31 | 180  | 6.35  | 2 | 5 | 2 |   |   |   |   |   |   |   | 2 | 4 | 2 |
| High | Q9UN37 | Vacuolar protein sorting-associated protein 4A                                | OS=Homo sapiens OX=9066 GN=VPS4A PE=1 SV=1    | 16 | 4  | 2  | 48.9  | 11 | 437  | 7.8   |   |   |   | 1 | 2 | 2 |   |   |   |   | 1 | 2 | 2 |
| High | P42338 | Phosphatidylinositol 4,5-bisphosphate 3-kinase catalytic subunit beta isoform | OS=Homo sapiens OX=9066 GN=PIK3CB PE=1 SV=1   | 16 | 5  | 5  | 122.7 | 5  | 1070 | 7.09  | 4 | 3 | 3 | 1 | 1 | 1 | 4 | 3 | 3 | 3 | 1 | 1 | 1 |
| High | P52701 | DNA mismatch repair protein Msh6                                              | OS=Homo sapiens OX=9066 GN=MSH6 PE=1 SV=2     | 16 | 8  | 8  | 152.7 | 7  | 1360 | 6.9   | 1 | 1 | 1 | 1 | 1 | 1 | 1 | 1 | 1 | 1 | 1 | 1 | 1 |
| High | P31939 | Bifunctional purine biosynthesis protein ATIC                                 | OS=Homo sapiens OX=9066 GN=ATIC PE=1 SV=3     | 16 | 8  | 8  | 64.6  | 18 | 592  | 6.71  | 2 | 2 | 4 |   |   |   |   |   |   |   | 2 | 2 | 4 |
| High | O95373 | Importin-7                                                                    | OS=Homo sapiens OX=9066 GN=IPO7 PE=1 SV=1     | 16 | 10 | 10 | 119.4 | 13 | 1038 | 4.82  | 5 | 2 | 3 |   |   |   |   |   |   |   | 5 | 2 | 3 |
| High | P35250 | Replication factor C subunit 2                                                | OS=Homo sapiens OX=9066 GN=RFC2 PE=1 SV=3     | 16 | 7  | 7  | 39.1  | 23 | 354  | 6.44  | 1 | 1 | 1 | 1 | 3 | 1 | 1 | 1 | 1 | 1 | 1 | 3 | 1 |
| High | Q9U130 | Multifunctional methyltransferase subunit TRM112-like protein                 | OS=Homo sapiens OX=9066 GN=TRMT112 PE=1 SV=1  | 16 | 2  | 2  | 14.2  | 22 | 125  | 5.26  | 2 | 1 | 1 | 2 | 2 | 2 | 2 | 1 | 1 | 1 | 2 | 2 | 2 |
| High | Q43248 | mRNA cap guanine-N7 methyltransferase                                         | OS=Homo sapiens OX=9066 GN=RNMT PE=1 SV=1     | 16 | 4  | 4  | 54.8  | 10 | 476  | 6.51  | 1 | 1 | 3 | 2 | 1 | 1 | 1 | 1 | 1 | 1 | 3 | 2 | 1 |
| High | Q14919 | E3 ubiquitin-protein ligase KCMF1                                             | OS=Homo sapiens OX=9066 GN=KCMF1 PE=1 SV=2    | 16 | 3  | 3  | 22.3  | 21 | 205  | 5.17  | 1 | 2 | 2 | 1 | 1 | 1 | 1 | 1 | 1 | 1 | 2 | 2 | 1 |
| High | P83881 | 60S ribosomal protein L36a                                                    | OS=Homo sapiens OX=9066 GN=RPL36A PE=1 SV=2   | 16 | 3  | 1  | 12.4  | 24 | 106  | 10.58 | 1 | 1 | 1 | 2 | 3 | 2 | 1 | 1 | 1 | 1 | 2 | 3 | 2 |
| High | Q15446 | DNA-directed RNA polymerase I subunit RPA34                                   | OS=Homo sapiens OX=9066 GN=POLR1G PE=1 SV=1   | 16 | 5  | 5  | 55    | 15 | 510  | 8.51  |   |   |   | 1 | 2 | 1 |   |   |   |   | 1 | 2 | 1 |
| High | Q14451 | Growth factor receptor-bound protein 7                                        | OS=Homo sapiens OX=9066 GN=GRB7 PE=1 SV=1     | 16 | 7  | 7  | 59.6  | 18 | 532  | 8.5   | 4 | 2 | 1 | 1 | 1 | 1 | 4 | 2 | 1 | 1 | 1 | 1 | 1 |
| High | P08174 | Complement decay-accelerating factor                                          | OS=Homo sapiens OX=9066 GN=CD55 PE=1 SV=4     | 16 | 4  | 4  | 41.4  | 9  | 381  | 7.59  | 2 | 2 | 1 |   |   |   |   |   |   |   | 2 | 2 | 1 |
| High | Q8TBC3 | SH3BP1-binding protein 1                                                      | OS=Homo sapiens OX=9066 GN=SH3BP1 PE=1 SV=2   | 16 | 4  | 3  | 76.3  | 8  | 707  | 8.28  |   |   |   | 3 | 2 | 3 |   |   |   |   | 3 | 2 | 3 |
| High | Q9NQC3 | Reticulon-4                                                                   | OS=Homo sapiens OX=9066 GN=RTN4 PE=1 SV=2     | 16 | 5  | 5  | 129.9 | 8  | 1192 | 4.5   | 1 | 2 | 2 | 1 | 2 | 2 | 1 | 1 | 2 | 1 | 2 | 2 | 1 |
| High | P50238 | Cysteine-rich protein 1                                                       | OS=Homo sapiens OX=9066 GN=CRIP1 PE=1 SV=3    | 16 | 3  | 3  | 8.5   | 56 | 77   | 8.75  | 3 | 2 | 2 | 1 | 2 | 1 | 1 | 2 | 1 | 2 | 1 | 2 | 1 |
| High | Q43447 | Peptidyl-prolyl cis-trans isomerase H                                         | OS=Homo sapiens OX=9066 GN=PPH1 PE=1 SV=1     | 16 | 4  | 4  | 19.2  | 23 | 177  | 8.07  | 2 | 1 | 2 | 1 | 1 | 1 | 1 | 2 | 1 | 2 | 1 | 2 | 1 |
| High | Q9NRR3 | NADH dehydrogenase [ubiquinone] 1 alpha subcomplex subunit 4-like 2           | OS=Homo sapiens OX=9066 GN=NDUFA4L2 PE=3 SV=1 | 16 | 3  | 3  | 10    | 29 | 87   | 9.92  | 1 | 3 | 3 |   |   |   |   |   |   |   | 1 | 3 | 3 |
| High | Q9P077 | E3 ubiquitin-protein ligase KCMF1                                             | OS=Homo sapiens OX=9066 GN=KCMF1 PE=1 SV=2    | 16 | 4  | 4  | 49.9  | 19 | 381  | 5.66  | 1 | 1 | 1 | 1 | 1 | 1 | 1 | 1 | 1 | 1 | 1 | 1 | 1 |
| High | Q9C0I8 | pre-mRNA 3' end processing protein WDR33                                      | OS=Homo sapiens OX=9066 GN=WDR33 PE=1 SV=2    | 16 | 4  | 5  | 145.8 | 6  | 1336 | 9.17  |   |   |   | 2 | 3 | 2 |   |   |   |   | 2 | 3 | 2 |
| High | Q865X6 | Glutaredoxin-related protein 5, mitochondrial                                 | OS=Homo sapiens OX=9066 GN=GLRX5 PE=1 SV=2    | 16 | 3  | 3  | 16.6  | 28 | 157  | 6.79  | 2 | 1 | 1 | 1 | 2 | 1 | 2 | 1 | 1 | 1 | 1 | 2 | 1 |
| High | P08621 | U1 small nuclear ribonucleoprotein 70 kDa                                     | OS=Homo sapiens OX=9066 GN=SNRNP70 PE=1 SV=2  | 16 | 4  | 4  | 51.5  | 12 | 437  | 9.94  | 1 | 1 | 2 | 1 | 1 | 1 | 1 | 1 | 1 | 1 | 2 | 1 | 1 |
| High | Q43760 | Synaptogyrin-2                                                                | OS=Homo sapiens OX=9066 GN=SYNGR2 PE=1 SV=1   | 16 | 4  | 4  | 24.8  | 17 | 224  | 4.94  | 2 | 3 | 1 |   |   |   |   |   |   |   | 3 | 1 | 1 |
| High | Q9NTK5 | Obg-like ATPase 1                                                             | OS=Homo sapiens OX=9066 GN=OLA1 PE=1 SV=2     | 16 | 5  | 5  | 44.7  | 11 | 396  | 7.81  | 1 | 2 | 1 | 1 | 1 | 1 | 1 | 2 | 1 | 1 | 2 | 1 | 1 |
| High | Q9UBC2 | Epidermal growth factor receptor substrate 15-like 1                          | OS=Homo sapiens OX=9066 GN=EPS15L1 PE=1 SV=1  | 16 | 5  | 5  | 94.2  | 5  | 864  | 5.11  |   |   |   | 3 | 1 | 1 | 1 | 1 | 1 | 1 | 3 | 1 | 1 |
| High | Q99615 | DnaJ homolog subfamily C member 7                                             | OS=Homo sapiens OX=9066 GN=DNAJC7 PE=1 SV=2   | 16 | 6  | 6  | 56.4  | 15 | 494  | 6.96  | 1 | 1 | 1 | 2 | 1 | 3 | 1 | 1 | 1 | 1 | 2 | 1 | 3 |
| High | P25787 | Proteasome subunit alpha type-2                                               | OS=Homo sapiens OX=9066 GN=PSMA2 PE=1 SV=2    | 16 | 4  | 4  | 25.9  | 23 | 234  | 7.43  | 1 | 1 | 1 | 2 | 3 | 2 | 1 | 1 | 1 | 1 | 1 | 2 | 2 |
| High | Q13769 | THO complex subunit 5                                                         | OS=Homo sapiens OX=9066 GN=THOC5 PE=1 SV=2    | 16 | 5  | 5  | 78.5  | 9  | 683  | 6.87  | 1 | 1 | 1 | 1 | 1 | 1 | 1 | 1 | 1 | 1 | 1 | 1 | 1 |
| High | Q72434 | Mitochondrial antiviral-signaling protein                                     | OS=Homo sapiens OX=9066 GN=MAVS PE=1 SV=2     | 16 | 4  | 4  | 55.2  | 11 | 540  | 5.22  | 1 | 2 | 2 | 1 | 2 | 2 | 1 | 2 | 2 | 1 | 1 | 2 | 2 |
| High | Q13098 | COP9 signalosome complex subunit 1                                            | OS=Homo sapiens OX=9066 GN=CPS1 PE=1 SV=4     | 16 | 6  | 6  | 55.5  | 16 | 491  | 6.74  | 1 | 1 | 1 | 1 | 1 | 1 | 1 | 1 | 1 | 1 | 1 | 1 | 1 |
| High | Q94916 | Nuclear factor of activated T-cells 5                                         | OS=Homo sapiens OX=9066 GN=NFA5 PE=1 SV=1     | 16 | 7  | 7  | 165.7 | 7  | 1531 | 5.24  | 2 | 2 | 8 |   |   |   |   |   |   |   | 2 | 2 | 7 |
| High | Q8TF72 | Protein Shroom3                                                               | OS=Homo sapiens OX=9066 GN=SHROOM3 PE=1 SV=2  | 16 | 8  | 8  | 216.7 | 7  | 1996 | 7.8   | 1 | 1 | 1 | 1 | 1 | 1 | 1 | 1 | 1 | 1 | 1 | 1 | 1 |
| High | Q15551 | Claudin-3                                                                     | OS=Homo sapiens OX=9066 GN=CLDN3 PE=1 SV=1    | 16 | 3  | 3  | 23.3  | 15 | 220  | 8.05  | 1 | 1 | 2 | 2 | 2 | 2 | 2 | 1 | 2 | 2 | 2 | 2 | 2 |
| High | Q9UKY1 | Zinc fingers and homeobox protein 1                                           | OS=Homo sapiens OX=9066 GN=ZHX1 PE=1 SV=1     | 16 | 6  | 6  | 98    | 15 | 873  | 6.05  |   |   |   |   |   |   |   |   |   |   |   |   |   |
